# Supplementary material for: Correcting for Static Shift of Magnetotelluric Data with Airborne Electromagnetic Measurements: A Case Study from Rathlin Basin, Northern Ireland
Source: Copernicus journal article supplement (doi:10.5194/se-2016-168), 2016-12-12
Supplement: Supplementary file [file se-2016-168-RC1-supplement.pdf]

# Correcting for Static Shift of Magnetotelluric Data with Airborne Electromagnetic Measurements: A Case Study from Rathlin Basin, Northern Ireland

Robert Delhay<sup>1,2</sup>, Volker Rath<sup>1</sup>, Alan G. Jones<sup>1,3</sup>, Mark R. Muller<sup>1,4</sup>, and Derek Reay<sup>5</sup>

<sup>1</sup>Dublin Institute for Advanced Studies (DIAS), 5 Merrion Square, Dublin 2, Ireland

<sup>2</sup>National University of Ireland, Galway, University Road, Galway, Ireland

<sup>3</sup>Complete MT Solutions, Ottawa, Canada

<sup>4</sup>Geophysical Consultant, Cambridge, United Kingdom

<sup>5</sup>Geological Survey of Northern Ireland (GSNI), Belfast, United Kingdom

*Correspondence to:* R. Delhay (rdelhay@cp.dias.ie)

**Abstract.** Galvanic distortions of magnetotelluric (MT) data, such as the static shift effect, are a known problem that can lead to incorrect estimation of resistivities and erroneous modelling of geometries with resulting misinterpretation of subsurface electrical resistivity structure. A wide variety of approaches have been proposed to account for these galvanic distortions, some depending on the target area, with varying degrees of success. The natural laboratory for our study is a hydraulically permeable volume of conductive sediment at depth, the internal resistivity structure of which can be used to estimate reservoir viability for geothermal purposes, however static shift correction is required in order to ensure robust and precise modelling accuracy.

We propose a method employing frequency-domain electromagnetic data for static shift correction, which in our case are regionally available with high spatial density. The spatial distributions of the derived static shift corrections are analysed and applied to the uncorrected MT data prior to inversion. Two comparative inversion models are derived, one with and one without static shift corrections, with instructive results. As expected from the one-dimensional analogy of static shift correction, at shallow model depths, where the structure is controlled by a single local MT site, the correction of static shift effects leads to vertical scaling of resistivity-thickness products in the model, with the corrected model showing improved correlation to existing borehole wireline resistivity data. In turn, as these vertical scalings are effectively independent of adjacent sites, lateral resistivity distributions are also affected, with up to half a decade of resistivity variation between the models estimated at depths down to 2000 m. Simple estimation of differences in bulk porosity, derived using Archie's Law, between the two models reinforces our conclusion that the sub-order of magnitude resistivity contrasts induced by correction of static shifts correspond to similar contrasts in estimated porosities, and hence, for purposes of reservoir investigation or similar cases requiring accurate absolute resistivity estimates, galvanic distortion correction, especially static shift correction, is essential.

## 1 Introduction

The electrical resistivity of a volume of rock is highly sensitive to the presence of laterally and vertically varying amounts of electrically conductive fluids connected via pore spaces or fluid conduits. Due to these potentially strong resistivity contrasts

between competent host rock and fluid penetrated rock, electromagnetic (EM) methods, and in particular magnetotellurics (MT), have been used with considerable success to image conductive volumes at depth (Chave and Jones, 2012; Simpson and Bahr, 2005).

As with all EM methods, MT data are highly sensitive to rock fluid content and distribution (i.e., porosity and hydraulic permeability), and can be related to other properties relevant to fluid movement. This has made the method particularly interesting for exploration of geothermal resources. Indeed, geothermal research was the first commercial application of MT in the late 1950s, though the interpretation of the corresponding conductive structures is not always straightforward (Muñoz, 2014).

The MT data set studied here was acquired in the context of a multi-disciplinary geothermal research program (IRETHERM, [www.iretherm.ie](http://www.iretherm.ie)), the overarching aim of which is to identify and evaluate low enthalpy geothermal resources within Ireland. One such resource (Goodman et al., 2004) is the thick, porous and permeable succession of Permian and Triassic sandstones found within several concealed sedimentary basins in Northern Ireland, with in particular the Rathlin Basin having significantly elevated estimated geothermal gradients in comparison to the remainder of Ireland (Reay and Kelly, 2010).

The island of Ireland was formed during the Caledonian Orogeny by the complex accretion of several continental and island arc fragments during the closure of the Iapetus Ocean between the Early Ordovician (485 Ma) and Late Silurian (423 Ma), resulting in seven identifiable terranes that comprise the present-day basement across both Ireland and Great Britain (Mitchell, 2004; Hepworth and Sanders, 2009). Our survey area (Figure 1) lies within the Central Highlands Terrane of Laurentia, the basement of which comprises mainly mid- to late-Neoproterozoic (1000-635 Ma) metasedimentary rocks classified as the Dalradian supergroup, a metasedimentary and igneous rock succession that was deposited on the eastern margin of Laurentia between late Neoproterozoic ( $\approx 800$  Ma) and Early Cambrian ( $\approx 510$  Ma) times. Specifically, the basement across the test area is assumed to consist of the latest-Proterozoic (Ediacaran, 635-541 Ma) Argyll Group of psammites and semipelites.

Regional shear and stress during the subsequent late-Paleozoic (350-250 Ma) Variscan orogeny reactivated the Caledonian (490-390 Ma) Tow Valley Fault (TVF), and the ensuing normal and dextral strike-slip faulting resulted in the formation of a rift basin later filled by a succession of sediments to form the Rathlin Basin. Although drilling in the adjacent Magilligan basin encountered Carboniferous formations at 1347 m TD, the most basal formations confirmed within the Rathlin Basin are the Permian Enler Group (EG) sandstones and early Triassic Sherwood Sandstone Group sandstones (SSG). Both formations are hydrocarbon reservoirs in the Irish Sea to the east (Naylor and Shannon, 2011). The Sherwood Sandstone Group is overlain by the late Triassic Mercia Mudstone Group (MMG), which is itself generally overlain by late Jurassic Lower Lias Group (LLG) mudstones. However, in many places significant dolerite and basalt sills (up to approx. 100 m in combined thickness) have been encountered, with poorly known spatial extent. The final and youngest successions in the basin are chalks of the Cretaceous Ulster White Limestone Formation (UWLF), with the Antrim Lava Group (ALG) concealing the basin entirely.

To date two deep boreholes have been completed onshore in the Rathlin Basin, namely the Port More 1 (PM1) and Ballinlea 1 (B1) boreholes, drilled in 1967 and 2008 respectively, however only data from the former are available as information from the latter is not yet in the public domain. The PM1 borehole was drilled to a total depth of 1897 m and terminated in the EG sandstones, with wireline log data acquired in two separate sections due to technical difficulties (Wilson and Manning, 1978). The upper portion of normal resistivity data covers the uppermost 250 m of the hole, including the Antrim Lava Group, Ulster

White Limestone Formation and the upper portion of the Lower Lias Group. These data provide relatively consistent resistivity estimates of  $\approx 80 \Omega\text{m}$  and  $\approx 5 \Omega\text{m}$  for the UWLF and LLG sedimentary formations respectively, whereas estimates for the ALG vary from  $\approx 5\text{--}80 \Omega\text{m}$  as it comprises a succession of tuffs and basalts. The lower portion of resistivity data spans the depth interval of  $\approx 1050\text{--}1450 \text{ m}$ , covering the boundary between the MMG and SSG at  $1320 \text{ m}$ , and provides resistivity estimates of  $\approx 4 \Omega\text{m}$  and  $\approx 6 \Omega\text{m}$  for the respective groups. The estimates within the SSG also show a higher variance, which may be due to the presence of conglomerates and breccias in the upper portion of the group. The stratigraphic column encountered in the PM1 borehole is displayed in Figure 2, alongside a plot of the borehole resistivity data.

Modelling of regional gravity and magnetic data has been undertaken, with results presented in Mitchell (2004) and Gibson (2004). The density model of Mitchell (2004) (Figure 3) shows a relatively homogeneous structure along the basin, particularly of the Permo-Triassic section, with a maximum depth to Dalradian basement of approximately  $3 \text{ km}$  modelled for the Rathlin Basin (located at  $33 \text{ km}$  distance along profile). This modelling adopts a density of  $2.35 \text{ Mg/m}^3$  for the assumed basal Carboniferous rocks; this value comes from boreholes samples in the adjacent Foyle Basin, and Mitchell advise that this value may be insufficiently dense to represent Rathlin Basin conditions. If Carboniferous sediments in the Rathlin Basin are of a higher density, a greater thickness of overlying lighter sediments (i.e., the target Permian and Triassic sandstones) would be required to be consistent with the observed gravity anomaly. Magnetic and gravity modelling by Gibson (2004) suggests that the Tow Valley Fault zone consists of a series of major fault segments with varying dip of  $20 - 50^\circ$  to the north-west.

Core samples of the EG and SSG sandstones successions gathered from the Port More 1 borehole show promising reservoir properties, with fractional porosities and hydraulic permeabilities ranging from  $0.10$  to  $0.22$  and  $1 \text{ mD}$ – $1\,000 \text{ mD}$  respectively (Mitchell, 2004). Equilibrated temperatures taken from both the PM1 and B1 boreholes have previously been used to estimate geothermal gradients. A temperature of  $35.4^\circ\text{C}$  was observed at  $582 \text{ m}$  depth in the PM1 borehole, whereas a temperature of  $99^\circ\text{C}$  was observed at  $2650 \text{ m}$  in B1 (Reay and Kelly, 2010). Assuming a surface temperature of  $10^\circ\text{C}$ , simple linear estimation gives calculated geothermal gradients of  $43.6$  (PM1) and  $33.6^\circ\text{K/km}$  (B1), both of which are elevated above the typical estimates of  $\approx 20\text{--}30^\circ\text{K/km}$  measured elsewhere across Ireland (Goodman et al., 2004). In conjunction with the promising reservoir properties and basin depth expected from gravity modelling, it has been proposed previously (Goodman et al., 2004; Reay and Kelly, 2010; Pasquali et al., 2010) that the Rathlin Basin may be favourable for geothermal exploitation. As the reservoir potential depends strongly on the intra-basin structure, variations in modelled resistivity may be taken as an excellent proxy for images of the presence of fluids, their distribution and interconnection within the basin.

The imaging of sub-basalt structures poses difficulties to other commonly employed geophysical methods, particularly seismics (e.g., Martini et al., 2005; Bean and Martini, 2010) due to the negative acoustic impedance contrast at the base of the basalt, and previous reflection experiments struggled to clearly image the sediments through the overlying ALG (Naylor and Shannon, 2011). As the MT method has been successfully applied in sub-basalt investigations both onshore and offshore (Hautot et al., 2007; Jegen et al., 2009; Colombo et al., 2011; Heincke et al., 2014), the method was proposed to study the three-dimensional electrical resistivity distribution of the sedimentary fill of the onshore portion of the Rathlin Basin.

Due to the expected elevated hydraulic properties and saline pore fluids (both factors that increase conductivity) of the proposed hydrothermal aquifer within the basin, it was expected that MT data could be carefully modelled to image the

properties and distribution of the aquifer formations. The increase in resistivity observed in wireline data from the MMG to the underlying target sediments implies that, depending upon the thickness of units beneath the MMG, MT may not be able to accurately estimate the units' resistivities, as MT is primarily sensitive to a layer's conductance (i.e., the ratio of a layer's thickness to resistivity), and thinner or less conductive layers may be shielded by overlying conductors (Jones, 1992). However, due to the proven thicknesses and similar lithologies of the SSG and EG sandstones it is still expected that the SSG and EG sediment fill will cause a sufficiently high resistivity contrast against the resistive metasedimentary country bedrock and provide a viable target for MT. The geometry of this interpreted aquifer structure is expected to be compatible with the gravity model presented in Figure 3.

The MT method samples the impedance transfer functions that relate the electric and magnetic field components of EM plane waves that propagate into the Earth. As these EM waves attenuate with dependency on the Earth's lateral and vertical resistivity distribution, the observed MT responses can be employed for estimating the underlying 3D resistivity distribution (Chave and Jones, 2012). The electric and magnetic field components of these EM source waves are each acquired in (preferentially) orthogonal horizontal directions, allowing the definition of four magnetotelluric transfer functions at the measuring location. These four elements carry information on the value and dimensionality of the subsurface resistivity structure at a range of periods. Many decompositions and analyses have been employed to expose this information (see, e.g., Chave and Jones, 2012, for an overview), with the aim of improving estimation or justifying 1D (i.e., resistivity varying with depth only) or 2D (i.e., resistivity varying with depth and one horizontal dimension only) modelling.

Though sensitive to conductive structures at depth, MT data are prone to distortion, primarily of the electric field, due to the presence of galvanic charges on the boundaries of shallow conductivity structures that are unresolvable at the frequency range of the recorded data. One simple form of this galvanic distortion is often easily identified by vertical offsets of the logarithmic apparent resistivity curves and is referred to as the static shift effect (Jones, 1988), following a similar effect in seismology named "statics". These galvanic signatures are related to inescapable issues in observation of the electric field, wherein point-wise electric field observations, assumed during modelling and inversion, are replaced during MT surveys with voltage difference measurements along finite length dipoles (Poll et al., 1989; Pellerin and Hohmann, 1990), and by issues related to insufficient gridding resolution to describe the lateral variability of the near surface that affect both the electric and magnetic fields (Chave and Smith, 1994; Chave and Jones, 1997). Although the former of these may be handled by appropriate post-processing when modelling and inverting the field measurements, any near-surface inhomogeneity not parameterised in the modelling or inversion process, even at the electrode scale size, will contribute to the galvanic signatures by distorting the local (primarily) electric fields. For land-based MT data, the magnetic effects of galvanic distortion only occur for a short frequency range of order half a decade at most (Chave and Smith, 1994; Chave and Jones, 1997).

Various methods have been proposed to quantify and correct for these static shift effects, including continuous sampling and filtering of the electric channels (Torres-Verdin and Bostick, 1992), spatial filtering based on mapping of MT data (Berdichevsky, 1989), modelling of parametric homogeneous layers at depth (Jones, 1988), estimation of distortion-related parameters as unknowns during inversion (Sasaki and Meju, 2006; Miensopust, 2010; Avdeeva et al., 2015; De Groot-Hedlin, 1991; DeGroot-Hedlin, 1995), and finally the use of complementary EM geophysical methods (Sternberg et al., 1988; Pellerin and Hohmann,

1990; Miensoopust et al., 2014). These methods can be broadly divided into methods that use intrinsic information from MT data and those that use extrinsic information from other geoscientific data. Whereas both families of methods can account for static shifts between MT modes at a single site and improve inter-station shifts, intrinsic information may not yield a correct resistivity in the case of both modes being distorted - as stated in Sternberg et al. (1988), "there is no reason to expect that either of the two MT polarisations will provide the correct resistivity.". In contrast, extrinsic methods using purely magnetic measurements (i.e. with no instruments using the subsurface as a component of their circuitry) by definition are unaffected by the electric effects of galvanic distortion, and thereby provide a more correct resistivity estimate, albeit generally for much shallower depths than magnetotelluric measurements. The use of extrinsic information may, in some cases, be limited by the requirement that both the extrinsic information and MT data must illuminate some common depth volume within the Earth with a common current system in order to allow reconciliation of the resistivity structure. For example, if the near-surface is three-dimensional (3D), then the current system from regionally-induced currents observed in MT is very different from the current system from locally-induced currents from a small EM transmitter-receiver array, and any resistivities estimated by MT would correspond to a different volume than that sampled by the smaller array.

140 Fortunately, in the case of the Rathlin Basin broad-scale extrinsic resistivity information is available. As part of the regional Tellus ground and airborne geoscience mapping programme across both Northern Ireland and the Republic of Ireland, frequency domain airborne electromagnetic data (FDEM) were gathered over the target area (Beamish, 2013) in 2005 and 2006. Sternberg et al. (1988) and Pellerin and Hohmann (1990) describe how time domain electromagnetic data (TDEM) can be used to estimate and correct static shift distortion of MT data, assuming that the MT data are one-dimensional (1D) or two-dimensional (2D) and in the correct geoelectric strike coordinate system, and we propose adapting their method to use the Tellus frequency domain AEM data for this purpose. Due to the high density of measurements often available, AEM data allow estimation of near-surface conductivity distributions at resolutions exceeding those of MT, making them an excellent choice for the correction of static shift effects.

As three-dimensional inversion of MT data is becoming a more common practice, the effects of static shift correction on resulting resistivity distributions must be considered. This article focuses on the implementation of this correction scheme for MT data by comparing models found by independent 3D MT inversion of the observed MT data and the static shift corrected MT data. In addition to comparing the model results, the statistical and spatial distribution of calculated static shift corrections are examined and compared to previous works to verify their validity. Both the absolute resistivity and resistivity gradients are used to evaluate the differences between the two models, with the implications of the differences discussed in the context of the possible geothermal aquifer. Note that the approach presented here is primarily methodological in nature; the geological interpretation is brief and will be investigated at length in a future publication.

## 2 Electromagnetic Methods

Electromagnetic (EM) methods include a wide variety of techniques that observe electromagnetic induction in the Earth, and are most commonly used to image the subsurface distribution of electrical resistivity  $\rho$  ( $\Omega\text{m}$ ), or its inverse, electrical con-

ductivity  $\sigma$  ( $\text{Sm}^{-1}$ ), and, at high frequencies, electrical permittivity  $\varepsilon$  ( $\text{Fm}^{-1}$ ). Subsurface materials are rarely homogeneous, and can generally be described as a mixture of materials with strongly differing properties, as detailed in Nover (2005) and Chave and Jones (2012). The bulk resistivity of a rock is commonly determined by very few of its constituents, with electrically the most important candidates at crustal depths being metallic conductors (sulfides, graphite, iron oxides), clays, and conductive fluids in pore spaces (both saline fluids and partial melts). Note that we use pore space in a general sense for primary and secondary porosity, including pores, fractures and conduits that may dominate the rock type under consideration. For low-enthalpy geothermal exploration in the upper crust, the most relevant property is the influence of electrolytic conduction by fluids in porous rocks. The relationship between the observed effective resistivity  $\rho$ , the pore fluid resistivity  $\rho_i$ , and the formation porosity  $\phi$  is classically described for sandstones by Archie's Law (Archie, 1947), with generalisations discussed in Glover (2010). As Archie's Law assumes a clean sandstone matrix with well established relationships between porosity and hydraulic permeability, its application may not always be appropriate, particularly if clay minerals are present (Mavko et al., 2009; Guéguen and Palciauskas, 1994; Zinszner and Pellerin, 2007).

In a broader sense, electrical conductivity is a proxy measure of hydraulic permeability rather than porosity, as interconnection of conducting pathways facilitates electric current flow. Due to this strong dependence on the geometry of flow paths at the scale of interest, the relationship between permeability and porosity is highly nonlinear (amongst others, Raffensperger, 1996; Pape et al., 1999, 2000; Luijendijk and Gleeson, 2015). These dependencies have a close relationship with the type and geologic history of the rock considered (see, e.g., Bernabe et al., 2003), and the often complex development of geological units can lead to heterogeneities and preferential flow pathways at all scale lengths (Bjørlykke, 2010).

## 2.1 Magnetotelluric Method

The magnetotelluric (MT) method uses impedance transfer functions relating the electric and magnetic field components of vertically-propagating EM source field plane waves to image the lateral and vertical resistivity distribution within the Earth. MT signal waves are generated by two sources, namely distant lightning strikes (generating signals of frequency  $> 7.8$  Hz, the Schumann resonance), and interactions of the Earth's magnetosphere with solar wind (generating signals of frequency  $< 10$  Hz). Recent detailed reviews of MT methods, the underlying assumptions, and their application include Simpson and Bahr (2005), Berdichevsky and Dmitriev (2008), and Chave and Jones (2012).

Resistivity information at a range of depths is inferred by considering planar EM waves in the Earth at a range of frequencies, as their attenuation at a given frequency is a function of the resistivity  $\rho$  and magnetic permeability  $\mu$  ( $\text{Hm}^{-1}$ ) of the subsurface material, where the latter is generally assumed not to vary from that of free space,  $\mu_0$ . In a uniform half-space (i.e., a space with no lateral or vertical resistivity variation) of resistivity  $\rho$ , the scale length  $\delta$  in metres describing this attenuation,

$$\delta = \sqrt{\frac{2\rho}{\omega\mu}} \approx 503\sqrt{\rho/f}, \quad (1)$$

is termed the electromagnetic skin depth, and describes the characteristic length over which the amplitude of an EM wave of frequency  $\omega = 2\pi f$  decays by a factor of  $e^{-1}$ . This quantity is commonly used as a simple measure for the depth of investigation

and radius of influence, although one must beware of its overuse in situations that depart from a uniform halfspace, especially in the case of a multi-dimensional Earth (Jones, 2006).

The resistivity of a select volume of the Earth, as sampled by an EM wave of frequency  $\omega$ , is determined from complex transfer functions that relate the amplitudes of the horizontal electric  $E_i$  ( $\text{Vm}^{-1}$ ) and magnetic  $H_j$  (Am) field components that constitute the wave, defined as the complex MT impedance tensor  $\mathbf{Z}(\Omega)$ . This is generally formulated in the frequency domain, where the transfer function can be defined by the ratio of the fields:

$$Z_{ij}(\omega) = \frac{E_i(\omega)}{H_j(\omega)}. \quad (2)$$

By considering both orthogonal and parallel pairs of fields, an impedance tensor  $\mathbf{Z}$  with four components ( $Z_{xx}, Z_{xy}, Z_{yx}, Z_{yy}$ ) can be defined:

$$\mathbf{Z} = \begin{pmatrix} Z_{xx} & Z_{xy} \\ Z_{yx} & Z_{yy} \end{pmatrix} \quad (3)$$

These impedances can be restated in more familiar magnitudes and units as an apparent resistivity  $\rho_a$  (i.e. equivalent half-space resistivity for a wave of that specific frequency for the orthogonal pairs  $Z_{xy}$  and  $Z_{yx}$ ), and phase lead of the electric field over the magnetic field  $\phi$  (which is  $\pi/4$  for a uniform half-space for the orthogonal pairs), defined by:

$$\rho_{a,ij} = \frac{1}{2\pi\mu} |Z_{ij}|^2 \quad (4)$$

$$\phi_{ij} = \arg(Z_{ij}) = \tan^{-1} \left( \frac{\Im(Z_{ij})}{\Re(Z_{ij})} \right). \quad (5)$$

In MT surveying, the electrical field  $E$  is measured as a voltage difference over an appropriate distance rather than at a point. For the sampling of the magnetic field components, the electromagnetic properties of the volume sampled within a sensor are known and homogeneous (being the internal properties of the sensor itself), and the averaged field sampled through this sensor volume accurately represents a point magnetic field value (to within a length scale of that of the sensor, typically 1.5 m for coil sensors used in broadband MT). However, the volumes sampled for the electric field components are of the order of 100 m (the typical bipole length in broadband MT (BBMT) surveys to acquire data in the frequency range of 100 to 0.01 Hz), with resistivity variations present within that length scale that may bias observations of the electric field. This distortion of primarily (but not exclusively) the electric field is one form of galvanic distortion and often manifests as frequency-independent multiplicative vertical offsets of MT apparent resistivity data for 1D or 2D cases (i.e., where impedance tensor diagonal components  $Z_{xx}$  and  $Z_{yy}$  are 0), when data are plotted as apparent resistivities on a log-log scale, hence the nomenclature of "static shift". As explained in e.g., Jones (2011, 2012), whereas real multipliers applied to an impedance tensor with 1D or 2D form affect only the magnitudes of the impedances, this is not the case if the impedance tensor has a 3D form with non-zero diagonal elements. Instead, the applied distortions cause mixing between the diagonal and off-diagonal components, affecting both the magnitudes and phases of the impedances.

## 2.2 Frequency Domain AEM method

The basic theory for airborne EM (AEM) can be found in Ward and Hohmann (1988). The frequency domain electromagnetic method, as implemented for the Tellus AEM surveys, uses a pair of small coils as the transmitter-receiver (Tx-Rx) pair. The transmitter can be treated as a magnetic dipole that induces eddy currents in the subsurface at discrete frequencies, allowing the resistivity structure to be characterised by comparing the primary and secondary magnetic fields ( $H_p$  and  $H_s$  respectively). In the Tellus surveys Tx and Rx are oriented in a vertical, coplanar configuration, i.e., the coil axes are horizontal (Leväniemi et al., 2009).

Though multidimensional modelling and inversion methods are available (see Auken et al., 2014, for a recent review), AEM data are commonly treated as representative of a one-dimensional (1D) Earth, with spatial smoothing or other constraints along 2-D flight lines possible to improve spatial continuity. One-dimensional modelling is usually performed based on analytical solutions for the layered Earth case, which are well known for most Tx-Rx configurations and can be found in many publications (Keller and Frischknecht, 1966; Ward and Hohmann, 1988; Kaufman et al., 2014). The particular analytical solution in a layered halfspace for vertical, co-planar configuration of the transmitter and receiver coils as used here (i.e. parallel, horizontal magnetic dipoles) is found in Minsley (2011). With the forward solution known, an inversion algorithm, such as the standard damped least-squares technique (Jupp and Vozoff, 1975) used in this work, can be applied to determine a suitable resistivity model.

## 3 Rathlin Basin Survey

MT data were collected at 56 sites across part of the onshore Rathlin Basin (site locations shown in Fig. 1) in May and June 2012. Seven parallel profiles were aligned perpendicular to the bounding Tow Valley Fault to the south-east (thick blue line on Fig. 1), with profile and site separations each of two kilometres in order to obtain a near-regular array of site locations, facilitating three-dimensional modelling and inversion. Both broadband (BBMT) (i.e., from  $\approx 300$  Hz to 0.001 Hz) and audio-magnetotelluric (AMT) (i.e., from  $\approx 10,000$  Hz to 10 Hz) data were acquired at each site. Data were recorded with Phoenix Geophysics MTU-5A receivers, with either MTC-50 (for BBMT) or AMTC-30 (for AMT) induction coils used to sample the horizontal magnetic field components ( $H_x$  and  $H_y$  respectively). Vertical magnetic field components ( $H_z$ ) were measured at almost all sites using either the appropriate induction coil or an AL-100 airloop, as deemed appropriate given the local ground conditions. The horizontal electric field components  $E_x$  and  $E_y$  were sampled by non-polarising lead-lead chloride (Pb-PbCl) PE4 Phoenix Geophysics electrodes arranged at each site in a cross configuration with electrode separations of typically 80 m. BBMT measurements were taken over a period of three nights at each site followed by an overnight measurement of AMT data.

Robust estimates of the frequency domain MT transfer functions were determined from the MT time series using commercial processing software from Phoenix Geophysics that implements the technique described in Jones and Jödicke (1984) and Jones et al. (1989). This approach is based on cascade decimation (Wight and Bostick, 1980), and uses a Least Trimmed Squares algorithm (Rousseeuw, 1984; Rousseeuw and Leroy, 2003) to achieve robustness of the estimate. Whilst a dedicated distant



remote reference site was not used, the principle of remote referencing, as described in Gamble (1979) and Gamble et al. (1979),  
255 was applied by using the horizontal magnetic field components of each simultaneously acquired site as reference fields, and  
selecting the best available site as reference (typically five sites were recorded simultaneously). Finally, the AMT and BBMT  
data at each site were merged into a single response, spanning from 10,000 to 0.001 Hz at most sites.

Although data were acquired at an array of sites with the intent of 3D inversion, as the data were expected to be predominantly  
2D in nature due to the expected strong lateral contrast across the bounding Tow Valley Fault, multi-site, multi-frequency  
260 Groom & Bailey distortion analysis was applied to the data on a cross-basinal profile basis using the *strike* analysis tool  
(McNeice and Jones, 2001). The results of the analysis are presented in Figure 4 for four depth bands. Analysis of the data with  
respect to depth in *strike* shows that the data are predominantly 1D or 2D to depths of  $\approx 2$  km, with increasing RMS misfits  
beyond these depths indicative of either a change in strike direction (i.e., still 2D structure, but with a different geoelectric  
strike direction) or fully 3D structure. Furthermore, collating the results from the seven profiles gives a mean geoelectric strike  
265 direction of  $53.4^\circ$  E, with a standard deviation of  $5.6^\circ$ . The mean geoelectric strike direction is coherent with the strike of  
the major structural feature, the Tow Valley Fault, however, it should be noted that as geoelectric strike directions inherently  
possess an ambiguity of  $\pm 90^\circ$ , the mean azimuth could also be interpreted as  $36.6^\circ$  W (i.e., a bearing of  $323.6^\circ$ ). As the  
site profile azimuths were aligned perpendicular ( $\approx 55^\circ$  W) to the mapped strike of the TVF in the area ( $\approx 35^\circ$  E), both the  
inversion mesh and input data were rotated to a bearing of  $315^\circ$  (i.e., midway between the mean geoelectric strike direction and  
270 dip direction of the TVF) in order to seek a balance between structural and geoelectric strike. Note that the data were rotated  
without decomposition, to retain information that does not conform to the 2D assumption in Groom-Bailey decomposition. For  
a similar reason, correction of static shifts was performed before rotation.

The MT responses were inverted for three dimensional models using the ModEM 3D MT inversion program (Kelbert et al.,  
2014; Egbert and Kelbert, 2012), with all four impedance tensor elements and vertical transfer functions as input data. MT data  
275 were downsampled to a subset of 28 frequencies, spanning from 1000 to 0.001 Hz (displayed in Figure 11), with an increased  
sampling of frequencies in the range most sensitive to the target sediment depths (1–0.01 Hz). In order to avoid leverage bias  
in the search for optimum solutions that minimise RMS misfit, poor quality data (typically located near cultural noise sources)  
were manually identified and removed from the input data. The mesh used for inversion was  $59 \times 68 \times 82$  cells in size (X,Y,Z)  
with the region of interest (the portion covered by MT sites) populated by cells of lateral extent 400 m by 400 m, with layer  
280 thicknesses logarithmically increasing beyond the depths required to accurately model bathymetry. Bathymetry was modelled  
by spanning the first 50 m depth interval with layers of 5 m, increasing to 25 m for the more distant (generally greater than  
5,000 m from coastline), deeper bathymetry, to a total depth of 300 m. Below the bathymetry, layers increased in thickness  
at a rate of increase of 1.01, increasing to a rate of 1.5 for depths beyond the volume of interest (i.e., beyond 4 km depth)  
to a total depth exceeding 1,500 km (i.e., at least 10 skin depths, given the initial halfspace resistivity of  $30 \Omega\text{m}$  and lowest  
285 frequency of 0.001 Hz). The highly efficient but approximate coast-effect forward modelling approach of Booker (described in  
Burd et al., 2014) was not used as some of our sites are located very close to the coast (well within one skin depth for moderate  
frequencies), requiring accurate modelling that could not be guaranteed with the approximate approach.

Inversion algorithms determine an appropriate model by iteratively adjusting a resistivity model, computing its forward MT responses, and comparing these responses to the observed data. Whereas the model steps vary depending on the precise algorithm implemented, there are several key parameters that influence an algorithm's behaviour, such as the data errors, type and degree of regularisation and initial starting and prior models. In particular, the distance between data and model responses, i.e., the sum of the squared residuals is used to measure the distance between the calculated and observed responses. To meet the assumptions of least squares theory, these residuals must be standardised, i.e., scaled by the variance of the measurements in order to make them normally distributed over  $\mathcal{N}(0, 1)$ . In order to facilitate convergence of the inversion process, an error floor is commonly applied to input data for MT inversions, wherein the error provided for inversion is defined as the greater of either the observed error or some function of the magnitude of the datum. Separate error floors were used for off-diagonal and diagonal impedance tensor components in this study of 5% and 20% of the mean magnitudes of  $(Z_{xy}, Z_{yx})$  and  $(Z_{xx}, Z_{yy})$  respectively. As the diagonal components observed were typically an order of magnitude smaller than the off-diagonal components due to generally 2D resistivity structures, the signal to noise ratio was significantly poorer, and applying a greater error floor here reduces the leveraging of the modelling process by noise-contaminated data.

The regularisation of an inversion describes the weighting between minimising the data residuals and some penalty function, commonly, a roughness penalty that enforces smoothness in order to stabilise the resulting model. ModEM allows for the specification of separate regularisation parameters for the x-, y- and z-directions, with higher values placing greater weight on the penalty function. Several values of these parameters were tested, however varying regularisation in the z-direction had a negligible effect on the model. Laterally isotropic values of 0.15, 0.3, and 0.45 were tested for the x- and y-directions, and whereas the overall model misfit did not vary significantly, lateral resistivity structure was strongly affected, with regularisation of 0.15 leading to discrete features with extreme resistivities (i.e., either very high or very low resistivity) beneath MT stations and poor continuity between sites. Resistivity structures in the models obtained with lateral regularisations of 0.3 and 0.45 correlated very well, with a slightly compressed range of resistivities present when regularisation was set to 0.45. In order to reduce over-smoothing of structural boundaries, final inversions were performed with lateral and vertical regularisation parameters of 0.3.

The starting model for each inversion was a 30  $\Omega\text{m}$  halfspace, with seawater to depths defined by coastal bathymetry fixed (i.e., invariant) at 0.3  $\Omega\text{m}$  (marine sediments were not included). Final resistivity models were obtained by two consecutive inversion runs: a first model was determined by inversion from a uniform halfspace starting model, then a second starting model was constructed by logarithmically averaging the resistivities in this first model with those of the starting halfspace. Inversion of the averaged starting model was found to improve model fits significantly and result in resistivity distributions of greater range and contrast across interpreted structural boundaries. This work flow was found to preserve broad structural outlines in order to guide the inversion algorithm whilst suppressing finer features (typically associated with local minima in model space).

Frequency domain airborne electromagnetic data (FDEM) in our MT survey area were acquired as part of the regional Tellus survey described in Beamish (2013). They were obtained in 2005 and 2006 across Northern Ireland by the AEM-05 system described by Leväniemi et al. (2009), at four frequencies (24510, 11962, 3005 and 912 Hz, respectively), resulting in

a geophysical data set spanning Northern Ireland. These data were collected along parallel flight lines spaced 200 m apart on a bearing of  $345^\circ$  at a nominal altitude of 56 m across almost all of Northern Ireland (increased altitudes were required above urban areas), with a spatial sampling rate of one sample approximately every 15 m along the flightlines. The pre-processing work flow of the AEM data is detailed at length in Beamish et al. (2006) and Leväniemi et al. (2009). Inversion of the FDEM data was performed using the one-dimensional AirBeo code from Amira International (Raiche, 1999) that implements the approach of Jupp and Vozoff (1975).

### 3.1 Correction of Static Shifts

The method proposed here for correction of static shift effects follows the approach of Pellerin and Hohmann (1990), adapted to using airborne FDEM data as extrinsic information. Earlier approaches took advantage of the downwards-propagating transient signal of the TDEM method to directly calculate an empirical, quasi-MT 1-D response (Sternberg et al., 1988), and later work by Pellerin and Hohmann (1990) developed this approach by explicitly modelling the TDEM data to obtain a 1-D resistivity model. The MT forward problem can be solved for this resistivity model, and factors  $\delta_{Ex}$ ,  $\delta_{Ey}$  that correct static shift between the calculated responses and observed data determined by taking the ratio of apparent resistivities. The resulting set of static shift corrected MT data may then be modelled as desired. We propose that the approach of Pellerin and Hohmann can be equally applied with FDEM data, subject to the same constraints, namely that there should be an overlap between the minimum depth of penetration of the MT sounding and the maximum depth of penetration of the extrinsic (to MT) information, and that the dimensionality of the two methods should agree. The first constraint mandates the use of high frequency AMT data rather than BBMT data to ensure overlapping volumes of sensitivity. A flowchart describing the steps taken in correcting the Rathlin Basin MT data with the Tellus AEM data is presented in Figure 5.

The approach used here is predicated upon certain key assumptions about the near-surface geology and the induced galvanic distortion, and these assumptions clearly show the limits of the approach. Firstly, as mentioned we assume that the near-surface geology is 1-D in structure, i.e., we can treat the off-diagonal impedance tensor elements  $Z_{xy}$  and  $Z_{yx}$  independently without rotating or otherwise preparing the data. Secondly, we assume that the galvanic distortion affects only the electric field; as the total electric field is represented by  $E_x$  and  $E_y$ , we require only two corrective factors  $\delta_{Ex}$  and  $\delta_{Ey}$  to be applied to the two impedance tensor element pairs corresponding to  $E_x$  and  $E_y$ , namely,  $(Z_{xx}, Z_{xy})$  and  $(Z_{yx}, Z_{yy})$ . Finally, whereas the cause of static shift type distortion of the MT data is estimation of the electric field, the airborne FDEM data are observations of the magnetic field (directly proportional to the electric field). Hence, the FDEM data are unaffected by static shift type distortion, and any resistivity estimates computed from these data are closer to the true values. For clarity about the effect of the static shift corrective factors,  $\delta_{Ex}$  and  $\delta_{Ey}$  are often presented here on a logarithmic scale; as the corrective factors transform to additive (or subtractive) changes of resistivity on a logarithm scale, their value is intuitively related to whether a correction to more resistive or more conductive true data is required. For example a (multiplicative) static shift corrective factor of  $\delta_E = 3.16$ , indicating that the true resistivity  $\rho_T = \delta_E \rho_{obs} = 3.16 \rho_{obs}$ , corresponds in logarithmic scale to an additive static shift correction, i.e.,  $\log_{10}(\rho_T) = \log_{10}(\rho_{obs}) + 0.5$ .

The first step of the implemented procedure is the inversion of the uncorrected MT data to obtain a baseline resistivity model for comparison  $M_o$ . The remaining steps describe how static shift corrected MT data  $\mathbf{Z}_c$  were obtained by solving the MT forward problem for a model of the AEM data, and in turn inverted to obtain a corrected resistivity model  $M_c$ .

- Step 1** 3D MT inversion of observed MT data  $\mathbf{Z}_o$  with the ModEM code to obtain model  $M_o$ . Both the inversion mesh and input data were rotated to a bearing of  $315^\circ$  for inversion.
- Step 2** Modelling of each four-frequency AEM sounding within the survey area as a single layer structure (i.e., halfspace) with Airbeo (Raiche, 1999), resulting in an apparent resistivity value at each location best reproducing the observed AEM data.
- Step 3** Interpolation of AEM halfspace models by inverse distance weighted (IDW) averaging of log-resistivity values to populate the uppermost 200 m of an MT forward modelling mesh with cells of  $170 \times 170$  m. Below the uppermost 200 m the model reverts to a  $100 \Omega\text{m}$  halfspace.
- Step 4** 3D solution of MT forward problem for the resistivity model found in Step 3 with ModEM, resulting in a set of high frequency synthetic MT responses at six frequencies from 10,000 to 1,000 Hz for each MT sounding location. The frequencies chosen coincide with those of the downsampled MT data.
- Step 5** Multiplicative static shift corrective factors  $\delta_{Ex}, \delta_{Ey}$  found by taking the ratio of apparent resistivities of the up to six high frequency MT responses found in Step 3.1 to those of the observed data (i.e.,  $\delta_{Ex} = \rho_{a,xy}(\text{synthetic}) / \rho_{a,xy}(\text{observed})$ ), over the 10,000–1,000 Hz band. Due to either noise contamination or non-1-D behaviour (i.e., violating our assumptions), not all data in the compared frequency band were used; typically, three to four of the six data points were compared. The corrective factors are applied to the entire bandwidth of the unrotated observed data to obtain  $\rho_a(\text{corrected})$ , with  $\delta_{Ex}$  applied to all elements dependent on  $E_x$ , i.e.,  $\rho_{a,xx}$  and  $\rho_{a,xy}$ .  $\delta_{Ey}$  is treated analogously.
- Step 6** The static shift corrected data are used as input for 3D MT inversion with ModEM to obtain an improved resistivity model  $M_c$ . Both the inversion mesh and input data were rotated to a bearing of  $315^\circ$  for inversion.

Whereas multi-layered models that better reproduce the AEM data can also be determined using Airbeo, they were not used in favour of the halfspace apparent resistivities for two principle reasons. Firstly, interpolation of the apparent resistivities to a 3-D MT mesh can be directly computed, whereas multi-layered models require more advanced approaches to reconcile variation in layer thicknesses unless these are explicitly set in the 1-D inversion to facilitate interpolation. Secondly, the depth of sensitivity of the lowest frequency of the AEM data (912 Hz  $\approx$  60 m, from forward modelling) has a moderately narrow overlap with the skin depth of the highest MT frequencies (10800 Hz, skin depth  $\approx$  50 m for a typical near-surface resistivity of  $\approx 100 \Omega\text{m}$ ). Above this overlapping volume, the MT data remain sensitive to but poorly resolve resistivity contrasts, and for the purposes of our work the added complexity in multi-layered AEM modelling does not significantly improve our results. A map of the halfspace models found from the AEM data in Step 3.1 is shown in Figure 6. As this work is reliant upon the depth of sensitivity of the FDEM data we assume that the causes of static shift encountered are locally one or two dimensional anomalies

that perturb estimates of the electric field estimates  $E_i$ , causing frequency-independent static shifts of the MT impedance data. Additionally, as each electric field component is used to compute two forms of data (i.e.,  $\{Z_{ii}, Z_{ij} \propto E_i\}$ ), the same correction  
390 will be applied to data sharing a common electric field component. Groom & Bailey distortion analysis of the high frequency MT data showed that the regional near-surface resistivity structure was 1D or 2D at most, validating this approach to correcting the static shift effects. We reiterate that for regions with regionally 3D structure this approach would be invalid.

The statistical and spatial distributions of the static shift multiplicative corrective factors  $\delta_{Ex}$  and  $\delta_{Ey}$  were examined for spatially coherent correlation and features that may be indicative of known regional-scale geological structures. The spatial  
395 distribution and magnitudes of the corrective factors across the survey area are shown in Figure 7. Whereas some spatial correlation between static shifts and geology is apparent, static shift variation mostly does not coincide with mapped surface geological boundaries, which invalidates the use of regional geological units as predictors of static shift. The histograms in Figure 8 show the distributions of the logarithmic transforms of  $\delta_{Ex}$  and  $\delta_{Ey}$ , with statistical quantities shown in Table 1 (the quantities of both  $\log \delta_{En}$  and  $\delta_{En}$  are tabulated, as are those of the mean static shift correction at each site  $\delta_{\bar{E}}$ ). The  
400 logarithmic distributions of both  $\delta_{Ex}$  and  $\delta_{Ey}$  pass Kolmogorov-Smirnov tests against normal distributions convincingly at significance levels of 0.01 (i.e., at the 99% confidence interval), suggesting that the static shifts themselves have a log-normal distribution. The longer tails towards conductive corrections likely indicate natural bias introduced by the sampling, such as the topographic location of the MT sites. The bivariate distribution of  $\log \delta_{Ex}$  and  $\log \delta_{Ey}$  from each site is shown in Figure 9, where the strong  $45^\circ$  (i.e.,  $\delta_{Ex} \approx \delta_{Ey}$ ) clustering indicates that the two electric field components at most sites are similarly  
405 affected by static shift type effects, with no evident regional preference for static shifts to one polarisation over the other.

From examination of the spatial and statistical distributions of  $\delta_{Ex}$  and  $\delta_{Ey}$ , the galvanic distortions present in these data show no consistent anisotropic behaviour, and weak spatial correlation with surface geology. As the accepted theory is that galvanic distortion is typically caused by irresolvable near-surface resistivity inhomogeneities below the level of resolution of the AMT data, the weak spatial correlation with surficial geology is unlikely to be random, and instead reflects the variation in  
410 heterogeneity of formations

For comparison, a histogram of the percentage of relative amount of static shift for both modes and all sites is plotted in Figure 10 alongside the similar measures of Sternberg et al. (1988) from an MT survey in the trans-Cascades, USA. The static shifts determined for our data using our approach show a stronger central tendency, with 64% of the static shifts being less than 0.2 of a decade in size, compared to 51% from Sternberg et al.. Additionally, the static shifts from the Rathlin Basin  
415 show a monotonic decrease in frequency with magnitude in contrast to the increased frequency of mid-sized shifts in the trans-Cascade case. These variations between the Rathlin Basin and trans-Cascade static shift characteristics are attributed to the greater variation in surficial geology and far larger area covered by the trans-Cascade data. Examining the shifts of data from the Cascade Mountain Range in isolation shows a mean shift of 0.3 to 0.4 decades in magnitude rather than the overall mean of  $\approx 0$  (i.e., no shift) when considering the entire data set. The structurally complex and resistive nature of the Cascade Mountain  
420 Range area was suggested as the explanation for this regional tendency towards static shifting of data, and it is likely that similar behaviour might be expected over a larger area of the Dalradian metasediments present in this study area. However, the present study does not cover a sufficiently large area to witness such variation.

### 3.1.1 Model Evaluation and Discussion

Initial comparison of the two models, one with ( $M_c$ ) and one without ( $M_o$ ) static shift correction, shows greater resistivity contrasts and sharper delineation between resistive and conductive volumes in the corrected model  $M_c$ , and for these reasons  $M_c$  is preferred for interpretation and evaluation of structures in the Rathlin Basin. Due to the static shift correction  $M_c$  also more likely better represents the correct resistivity distribution of the real Earth. Figures 12–15 present the resistivity distribution  $\rho$  of horizontal and vertical slices taken through the preferred model  $M_c$  (profile locations are marked on Figure 1). Measures of model comparison are also shown on these figures, and are discussed below (note that no images of the resistivity distribution of  $M_o$  are presented, as the resistivity differences with respect to  $M_c$  are subtle and difficult to perceive given the dynamic range of resistivities in the visualisation). The two models generally show good correlation of geoelectric structural geometries, but differ in the absolute resistivity estimates and the exact extent of these structures.

The resistivity structure of  $M_c$  is generally quite simple, with the most prominent feature being the extensive conductor, of resistivity less than 10  $\Omega\text{m}$ , that lies between 900 and 2000 m depth, and extends from the Tow Valley Fault in the south-east for a distance of up to 10 km towards the north-west.

We propose that this conductor represents primarily the conductive MMG, with a clearly delineated upper boundary. Interpretation of the lower boundary against the SSG (and equally, the boundary between the SSG and the EG sandstones) is hindered by both the smoothing effects of the regularised inversion approach used, and that inductive EM responses are intrinsically sensitive to the tops of conductive units (and their integrated conductivity), rather than to the bottoms of conductive units (i.e., the tops of resistive units). The TVF, which forms the south-eastern boundary of the basin, is clearly defined, although the angles of dip modelled are slightly shallower than those modelled in Gibson (2004), again likely due to smoothing within the MT inversion process. The Dalradian metasedimentary horst is represented by the highly resistive volume in the south-east of the model, and is visible at all depths and on both cross-basin profiles with a relatively homogeneous structure. All three profiles show the shallowest 500 m as moderately resistive, correlating well with the expected extent and thickness of the ALG basalts and UWFL. Minor conductors of 10 – 50  $\Omega\text{m}$  occurring between depths of 300 and 600 m are interpreted as the LLG, although these depths are slightly greater than the depths observed in the PM1 borehole. The uppermost resistivities within the model correlate well with the mean of the resistivity measurements from the PM1 borehole for the ALG and underlying sediments, though clearly without the same vertical resolution.

In order to demonstrate the lateral heterogeneity of the basin and intra-basinal structures, Figure 16 shows the resistivity distribution of the basin portion of  $M_c$  as a set of layer-by-layer histograms, each histogram normalised by the number of counts for the mode of that layer. As the model becomes much smoother below depths of approximately 2500 m, several tests were carried out to examine the sensitivity of the model responses to resistivity contrasts beyond these depths. Insertion of synthetic resistive bodies showed that the model responses are sensitive to them but unable to resolve resistivity contrasts below the conductive basin. It remains possible that older sediments with higher resistivity exist below this depth, however the resistivity contrasts present within the MT data are insufficient to clarify their existence or extent.

Two diagnostic measures were used to assess the changes between  $M_c$  and the original model  $M_o$  caused by static shift correction. The first diagnostic measure is the logarithmic resistivity difference  $\Delta$  between the two models,

$$\Delta(M_c, M_o) = \log_{10} \frac{\rho_{M_c}}{\rho_{M_o}}, \quad (6)$$

and the second is the normalised crossgradient  $NCG$  of the two models, being the cross-product of each model's gradient vectors at each cell,

$$NCG(M_c, M_o) = \frac{|\nabla M_c \times \nabla M_o|}{|\nabla M_c| |\nabla M_o|}. \quad (7)$$

The normalised crossgradient was introduced in Gallardo and Meju (2003) in the context of joint inversion based on structural similarity, and has been used by e.g. Schnaidt and Heinson (2015) and Rosenkjaer et al. (2015) to highlight structural similarities and differences between resistivity models.

As the logarithmic resistivity difference  $\Delta$  between  $M_c$  and  $M_o$  highlights discrepancies in the absolute resistivity values of the two models, it is more useful for observing contrasts in formation resistivities (i.e., locations where one model has a relative minimum or maximum) rather than comparing structural boundary locations. The figures presented show that the conductive features in  $M_c$  tend to be between 0.25 and 0.50 of a decade more conductive than their equivalent volumes in  $M_o$ , whereas the resistive features show similar tendencies towards greater resistivity in  $M_c$ . The largest vertical variations in  $\Delta$  (i.e., from a local maximum to a local minimum, or vice versa) are typically seen at the upper boundary of the MMG, making interpretation of this boundary far less subjective in model  $M_c$ . The resistivity difference  $\Delta$  also shows greater definition of the thin conductors interpreted as the LLG, which are difficult to delineate on the plots of resistivity alone due to weaker resistivity contrasts. The metasedimentary horst shows a range of both conductive and resistive contrasts, however, as this region shows greater geoelectrical heterogeneity and greater static shift effects in the observed data, the cause of these differences are variations in the uncorrected data used to model  $M_o$  rather than the relatively uniform horst seen in  $M_c$ . The spatial distribution of  $\Delta$  is insightful, particularly the distribution of points where  $\Delta = 0$  (i.e., points where  $M_o$  and  $M_c$  have the same resistivity) which generally do not coincide with the resistivity minima or maxima of  $M_c$ , nor with the identifiable resistivity boundaries. Instead, these points in places indicate regions in which the structural geometries differ between models, such as thicker or thinner conductive bodies (e.g., at  $\approx 800$  m depth, 10000 m along Profile A, Figure 13b, where the  $\Delta = 0$  line occurs in the middle of a conductor). These differences in geometry are most noticeable as horizontal features in the uppermost 1000 m, where the models are constrained locally by single sites and the static shift correction affects the model in a generally 1D manner. The lateral distribution of  $\Delta$  at these shallow depths is a result of the pseudo-1D local scaling of the model differing from site to site; as such we do not expect the distribution of  $\Delta$  to replicate those of the static shift corrections themselves (except for the trivial case of surficial and immediately sub-surficial layers).

The normalised crossgradient  $NCG$  is largest where the gradient vectors (i.e., resistivity changes) of the two models are orthogonal, such as differences in structures and locations, or similar structure but differing magnitude of resistivity change (i.e., difference in curvature of the model). Both situations of elevated  $NCG$  are evident in the models, especially on the zero- $\Delta$  lines (i.e., where the resistivity models intersect and  $\Delta$  reverses polarity, requiring significantly different gradient vectors), and

at resistivity minima and maxima of  $M_c$  (and assumingly  $M_o$ , although not shown), indicating a difference in curvature due to slight offsets of critical resistivity points, or large resistivity differences in co-located critical points. We note again that the significant variation in  $NCG$  values computed in the Dalradian horst likely reflects the heterogeneity of this block. Whereas the  $NCG$  was originally proposed as a means of determining structural similarity between models, our use of the  $NCG$  in this study suggests that it may also be used to assess the coincidence of similar structure with different resistivities.

The closeness of MT model responses to the data is commonly judged by the normalised root mean square error (nRMS), defined as

$$nRMS = \sqrt{N^{-1} \sum_{i=1}^N \tilde{r}_i^2}, \quad (8)$$

where  $\tilde{r}$  is the residual between calculated and observed data, normalized by the square root of its variance. In the case of a sufficient number of data  $N$  with approximately Gaussian and independent misfits, nRMS error should approach one for a model fitting to within one standard error, however, the application of an error floor to the observed misfits results in artificially lowered nRMS errors. Additionally, due to the global averaging of residuals an nRMS error is uninformative about which portion of data are poorly fit.

Regardless, the nRMS error remains a useful metric for comparing the relative goodness-of-fit of a succession of model responses to the same data set. The two models presented here reproduce the observed and corrected MT responses to similar degrees with overall nRMS of 1.77 and 1.96 for  $M_c$ , the corrected model (66 iterations total), and  $M_o$ , the original model (52 iterations total) respectively. Figure 17 shows the distribution of misfit between the data and the model responses of  $M_c$  for the four impedance tensors elements at each frequency and site, allowing a better insight into which the portions of the data are worse fit than can be drawn from a single nRMS value for the entire model. The measure of misfit displayed is the magnitude of the residual (the absolute value of the difference between the model response and observed datum), normalised by the error used for inversion (the larger of the experimental error or the applied error floor), similar to the overall nRMS defined in Equation (8), with values of 1 or less indicating a residual smaller than the error (i.e., fit to within one  $\sigma$ ). In general, the off-diagonal components are well fit, with a handful of sites showing poorer fits with respect to phase components. As the model responses are noise-free and have internally consistent magnitude and phase behaviours, worse misfits to impedance phases in comparison to magnitudes implies that the affected portions of the data themselves may not entirely satisfy the assumption of being in the far-field region of signal, likely due to the proximity of a noise source. The misfits of the diagonal impedance components show similar behaviour in that the magnitude is better fit than the phases, however, the differences in fit between magnitudes and phases are greater for the diagonals. Some increase in misfit is expected at the high frequency limits due to relocation of MT sites to the centre of their respective cells for computation; as the cells are 400 m wide within the survey area, the model is effectively 1D for forward computation of MT responses at such high frequencies, and diagonal impedances are 0 for such resistivity structure. As the observed diagonal MT data can be non-zero due to resistivity variations at scale lengths below those used for modelling purposes, the fit of these data can be improved by the use of a finer mesh, with a corresponding increase in computation time. At longer periods the misfits of diagonal phases are increased for the same reasons as the off-diagonal phases, namely, noise contamination in the data, however, due to the generally smaller magnitudes



of the diagonal MT data the signal-to-noise ratio can be considerably worse. It is possible that the error floor used for the diagonal components is perhaps too stringent, and lower misfits would be obtained with a higher error floor, however, as the  
525 observed data imply predominantly 2D structure (as shown in Figure 4), such a change is unlikely to drastically change the final model.

Although examining the misfits of a single model's responses to the data set used in its determination in such a granular fashion is useful in determining which data components are poorly fit and possibly why, taking a similar approach in order to compare two models is not valid in this case. Due to the application of individual static-shift corrections to each site's MT data,  
530 the gradients of the respective data spaces of the models are significantly altered. As most inversion algorithms (the NLGG method implemented in ModEM included) rely upon gradients within the data space to determine the direction of line searches as part of their optimisation, the static shift corrections applied all but guarantee that the two inversions presented in this work are the products of different paths through their data spaces. Hence, although the overall mean nRMS estimates are similar, we cannot categorically state that any differences in misfit at the granular, individual datum level are not simply due to the  
535 different gradient progressions.

The key test of the two models lies in comparing the measured resistivity values from the PM1 Borehole to the vertical resistivity columns from  $M_c$  and  $M_o$  corresponding to the location of the borehole (Figure 18). The input data for the two inversions differ solely in the application of static shift corrections, assumed to only affect the magnitude of the data; considered as a purely 1D problem, such a shift results in rescaling of both layer resistivities and thickness. The nRMS misfits of the two  
540 models' responses for this location are 0.97 ( $M_c$ ) and 1.05 ( $M_o$ ). The effect in 3D is more complicated, as the variation occurs in both lateral and vertical directions, however, some geometrical correlation and similar shaped structures can still be expected in each of the two models. Note that we argue this based upon the perturbation of the data magnitudes, rather than the similar nRMS - as mentioned, such an assumption based on misfit is unreasonable. Additionally, for the uppermost extents of the model (i.e., at depths within the inductive volume of only a single MT site), it can be seen that the application of static  
545 shift corrections results in similar effects to a 1D case, i.e., a model from data that have been static shifted upwards to higher apparent resistivities will have increased resistivity-thickness products (thicker, more resistive layers). With this behaviour in mind, the two models  $M_c$  and  $M_o$  have very similar geometries at shallow depths (the uppermost 200 m), with the resistivities of  $M_c$  significantly closer to the mean of the borehole measured resistivities. Due to the regularisation of the inversion process, neither model can adequately reproduce the highly variable near-surface variations measured through the ALG in the borehole.  
550 Comparison of the structures at deeper depths show that whereas  $M_c$  has conductive layers at 300 and 1300 m depth, with resistivities of  $\approx 3$  and  $15 \Omega\text{m}$ , interpreted as the middle of the LLG sediments and the combined conductances of the MMG and SSG respectively, the equivalent conductors (assuming a scaled geometry) in  $M_o$  occur at 450 m and 1500 m, with resistivities of  $\approx 20$  and  $\approx 8 \Omega\text{m}$ . Similarly, the models show a resistor of  $\approx 60$  and  $\approx 30 \Omega\text{m}$  at 600 and 750 m depth in  $M_c$  and  $M_o$  respectively. Given the knowledge of the lithology and the measured borehole resistivities, we conclude that  $M_c$  is a  
555 categorically superior resistivity model in that, of the two models, it more accurately and correctly resolves the central depths and resistivity values of the lithological units encountered. Critically, the limited borehole resistivity data in the MMG and SSG suggest that resistivity increases slightly with depth between the two units, and whereas the resistivity column of  $M_o$

more closely matches the absolute resistivity values, the column of  $M_c$  better approximates the trend of the observed borehole resistivities. Without further external information to verify the models with, the smaller differences between the  $M_o$  model resistivity column and the borehole resistivity measurements of the target sediments cannot lead to the acceptance of the entire model, as the shallower structure is poorly recovered. Conversely,  $M_c$ , the static shift-corrected model, correlates well with the borehole lithological boundaries from the PM1 borehole. and shows a trend in resistivity with depth that matches the trend evident in the wireline resistivity measurements.

Changes in resistivity at depth from static shift correction have strong implications for the interpretation of the reservoir potential of the area. Assuming Archie's Law holds and depending on the cementation exponent  $m$  (formation dependent, but typically  $\approx 2$  for reservoir formations), a relative change in resistivity  $f_\rho$  between two models  $\rho_c$  and  $\rho_o$  (i.e.,  $\rho_c = f_\rho \rho_o$ ) corresponds to a change in porosity of  $\phi_c = f_\phi \phi_o$ , where  $f_\phi \propto \sqrt[m]{f_\rho}$ . Given the complex and highly non-linear relationship with very high exponents correlating porosity to hydraulic permeability, the effects of the small resistivity changes caused by correction of static shift effects are further magnified when considering permeability. At this stage, given the paucity of borehole information and unfavourable geoelectric setting (in which the conductive MMG directly overlies the moderately less conductive SSG and EG reservoir targets), we are unable to further quantify or estimate the hydraulic properties of the reservoir targets within the Rathlin Basin with any useful level of confidence.

The quasi-1D correction of static shift effects applied here affects the resulting three-dimensional models to significantly greater depths than expected, with differences between the corrected and uncorrected resistivity models of up to half an order of magnitude present at depths of up to 2,000 m (see for example the constant depth slice at 2,100 m depth in Figure 12) that do not correlate with the spatial distribution of applied static shift corrections (Figure 7). Whereas the structural geometries are very similar between the two models (especially in the shallow regions constrained by single MT sites), interpretations of the target sediment locations in the models differ in significant ways, with both depth to sediments and absolute resistivity affected. As such, it is clear that when seeking accurate resistivity and depth estimates in three dimensional modelling of MT data galvanic distortion must be accounted for as its effects are subtle but pervasive.

#### 4 Conclusions

An approach for correction of static shift type galvanic distortion in MT data utilizing airborne FDEM data has been established in the nature of previous methods that used TDEM data for the same purpose. This approach was tested on an MT data set from Northern Ireland, using a publically-available regional dataset of airborne frequency domain electromagnetic data to create a set of corrected MT data. Three-dimensional inversion of each magnetotelluric data set recovers structures with similar geometries, however, structures in the near-surface show scaling of resistivity-thickness products proportional to the static shift correction applied. When compared to geophysical borehole logs it is clear that the model from static shift corrected data reproduces the observed resistivity with significantly greater fidelity. Significant sub-orders of magnitude variations in resistivity are caused in the model by correction of the static shift components of galvanic distortion, not only in the near-surface but extending down to the target sediment depths ( $\approx 1500$  m). As the test area is a prospective geothermal exploitation

site (a sedimentary aquifer with elevated temperatures), electrical resistivity could be used to infer the heterogeneous distribution of hydraulic properties within the reservoir, however, the sub-order of magnitude perturbations caused by inadequate consideration of galvanic distortion would lead to gross mis-estimation of these physical properties.

The statistical distribution of calculated static shift magnitudes show some similarity to previously published works with static shift estimates derived from other methods, and the model determined by inversion of these corrected data was found to better recover the resistivity structure observed in a nearby borehole. Based on these observations, we conclude that airborne FDEM data provide sufficiently accurate resistivity estimates to be used as a matter of course for static shift correction of MT data in appropriate areas (i.e., locales where the near-surface resistivity distribution is approximately one dimensional). Given the often regional acquisition and open availability of such AEM data, it is hoped that this approach provides future MT surveys in such areas an alternate method to evaluate and correct static shift type distortion. Additionally, whereas our approach assumes one dimensional, single layer models for the AEM data in deriving the static shift corrections, future advances could investigate what effect more advanced AEM modelling (i.e., multiple layers or, where applicable due to AEM acquisition specifications, full 3D modelling) would have on the computed forward MT responses and associated static shift corrections.

## 5 Code availability

Aside from the processing codes used to convert the measured MT time series data to robust impedance data (implemented in propriety programs from Phoenix Geophysics), codes used in this article are available for academic and non-commercial purposes. The Airbeo program for AEM modelling is part of the P223 software suite of Amira International, assembled by CSIRO, and available from Amira International's website. The Strike program for distortion analysis of MT data can be obtained by contacting AG Jones, the co-author of McNeice and Jones (2001). The ModEM code for three-dimensional inversion of MT data is available for non-commercial use from its authors' website, hosted by Oregon State University.

## 6 Data availability

Two types of geophysical data were modelled for this article, namely, airborne FDEM and MT data. The airborne FDEM data set is publically available under the Tellus Project, and accessible from the project's website. The initial Tellus Project collected airborne geophysics and surface samples across Northern Ireland, and subsequent projects have expanded the data set to cover a significant portion of Ireland.

The collection of the MT data, as part of the IRE THERM Project, was funded by Science Foundation Ireland; as a publicly-funded project the data are intended to be publically available. IRE THERM data will be uploaded to the European Plate Observing System (EPOS - [www.epos-ip.org](http://www.epos-ip.org)) Data Centres, upon the data centres' completions, however, in the interim period MT data can be provided by the authors upon request.

620 *Author contributions.* R Delhaye, AG Jones and MR Muller designed the MT acquisition plan, with contributions from D Reay in terms of  
prior geological and geophysical knowledge. R Delhaye and MR Muller carried out the acquisition, with the assistance of the acknowledged  
IRETHERM MT Team. MT data processing was done by R Delhaye, under instruction from AG Jones and MR Muller. The workflow for  
AEM modelling and MT static shift correction was planned and executed by R Delhaye and V Rath. MT inversions performed by R Delhaye,  
with instructive direction from A Jones and V Rath. Manuscript prepared by R Delhaye and V Rath, with insightful comments and review  
625 from A Jones and M Muller.

*Acknowledgements.* We would like to acknowledge Science Foundation of Ireland for the financial support for the IRETHERM project  
(10/IN.1/I3022) to AGJ, particularly the student support to RD. MT data acquisition was only possible with the assistance of the IRETHERM  
MT Team ( S. Blake, T. Farrell, C. Hogg, J. Vozar, C. Yeomans). Gary Egbert, Anna Kelbert and Naser Meqbel are very gratefully thanked  
for making their ModEM code available to the community, and especially Naser Meqbel for installing it on our clusters and those of the Irish  
630 Centre for High-End Computing (ICHEC). The Geological Survey of Ireland and the Geological Survey of Northern Ireland are thanked for  
providing access to Tellus Project data and other complementary information. M. Dessisa of the GSNI is especially thanked for his assistance  
with the latter. Amira International is thanked for providing open access to the P223 modelling suite. We also acknowledge the work of the  
Geological Survey of Ireland-funded project GSI-sc-04, "Spatially constrained Bayesian inversion of frequency- and time-domain airborne  
electromagnetic data from the Tellus projects" in advancing the available tools and utilities for handling of Tellus Project airborne data.  
635 ICHEC is thanked for providing the computational capability required for us to perform our inversions.

## References

- Archie: Electrical Resistivity an Aid in Core-Analysis Interpretation, AAPG Bulletin, 31, doi:10.1306/3d93395c-16b1-11d7-8645000102c1865d, <http://dx.doi.org/10.1306/3d93395c-16b1-11d7-8645000102c1865d>, 1947.
- Auken, E., Vest Christiansen, A., Kirkegaard, C., Fiandaca, G., Schamper, C., Behroozmand, A. A., Binley, A., Nielsen, E., Effersø, F., Christensen, N. B., Sørensen, K., Foged, N., and Vignoli, G.: An overview of a highly versatile forward and stable inverse algorithm for airborne, ground-based and borehole electromagnetic and electric data, *Exploration Geophysics*, 46, 223–235, doi:10.1071/EG13097, <http://dx.doi.org/10.1071/EG13097>, 2014.
- Avdeeva, A., Moorkamp, M., Avdeev, D., Jegen, M., and Miensopust, M.: Three-dimensional inversion of magnetotelluric impedance tensor data and full distortion matrix, *Geophysical Journal International*, 202, 464–481, doi:10.1093/gji/ggv144, <http://gji.oxfordjournals.org/content/202/1/464.abstract>, 2015.
- Beamish, D.: The bedrock electrical conductivity structure of Northern Ireland, *Geophysical Journal International*, 194, 683–699, doi:10.1093/gji/ggt073, <http://dx.doi.org/10.1093/gji/ggt073>, 2013.
- Beamish, D., Cuss, R. J., Lahti, M., Scheib, C., and Tartaras, E.: The Tellus Airborne Geophysical Survey of Northern Ireland: Final Processing Report, Internal Report IR/06/136, British Geological Survey, Nottingham, UK, 2006.
- Bean, C. J. and Martini, F.: Sub-basalt seismic imaging using optical-to-acoustic model building and wave equation datuming processing, *Marine and Petroleum Geology*, 27, 555–562, doi:10.1016/j.marpetgeo.2009.09.007, <http://dx.doi.org/10.1016/j.marpetgeo.2009.09.007>, 2010.
- Berdichevsky, M.: Methods used in the U.S.S.R. to reduce near-surface inhomogeneity effects on deep magnetotelluric sounding, *Physics of The Earth and Planetary Interiors*, 53, 194–206, doi:10.1016/0031-9201(89)90003-4, [http://dx.doi.org/10.1016/0031-9201\(89\)90003-4](http://dx.doi.org/10.1016/0031-9201(89)90003-4), 1989.
- Berdichevsky, M. N. and Dmitriev, V. I.: *Models and Methods of Magnetotellurics*, Springer, Berlin-Heidelberg, Germany, 2008.
- Bernabe, Y., Mok, U., and Evans, B.: Permeability-porosity Relationships in Rocks Subjected to Various Evolution Processes, *Pure and Applied Geophysics*, 160, 937–960, 2003.
- Bjørlykke, K.: *Petroleum Geoscience: From Sedimentary Environments to Rock Physics*, Springer, Berlin-Heidelberg, Germany, 2010.
- Burd, A. I., Booker, J. R., Mackie, R., Favetto, A., and Pomposiello, M. C.: Three-dimensional electrical conductivity in the mantle beneath the Payún Matrú Volcanic Field in the Andean backarc of Argentina near 36.5°S: evidence for decapitation of a mantle plume by resurgent upper mantle shear during slab steepening, *Geophysical Journal International*, 198, 812–827, doi:10.1093/gji/ggu145, <http://dx.doi.org/10.1093/gji/ggu145>, 2014.
- Chave, A. D. and Jones, A. G.: Electric and Magnetic Field Galvanic Distortion Decomposition of BC87 Data., *Journal of geomagnetism and geoelectricity*, 49, 767–789, doi:10.5636/jgg.49.767, <http://dx.doi.org/10.5636/jgg.49.767>, 1997.
- Chave, A. D. and Jones, A. G.: *The Magnetotelluric Method: Theory and Practice*, Cambridge University Press, Cambridge, UK, doi:10.1017/cbo9781139020138, <http://dx.doi.org/10.1017/cbo9781139020138>, 2012.
- Chave, A. D. and Smith, J. T.: On electric and magnetic galvanic distortion tensor decompositions, *J. Geophys. Res.*, 99, 4669–4682, doi:10.1029/93jb03368, <http://dx.doi.org/10.1029/93jb03368>, 1994.
- Colombo, D., Keho, T., Janoubi, E., and Soyer, W.: Sub-basalt imaging with broadband magnetotellurics in NW Saudi Arabia, in: *Expanded Abstracts of the SEG San Antonio 2011 Annual Meeting*, vol. 619–623, 2011.

- De Groot-Hedlin, C. D.: Removal of static shift in two dimensions by regularized inversion, *Geophysics*, 56, 2102–2106, doi:10.1190/1.1443022, <http://geophysics.geoscienceworld.org/content/56/12/2102.abstract>, 1991.
- DeGroot-Hedlin, C.: Inversion for regional 2-D resistivity structure in the presence of galvanic scatterers, *Geophysical Journal International*, 122, 877–888, doi:10.1111/j.1365-246X.1995.tb06843.x, <http://gji.oxfordjournals.org/content/122/3/877.abstract>, 1995.
- Egbert, G. D. and Kelbert, A.: Computational recipes for electromagnetic inverse problems, *Geophysical Journal International*, 189, 251–267, doi:10.1111/j.1365-246x.2011.05347.x, <http://dx.doi.org/10.1111/j.1365-246x.2011.05347.x>, 2012.
- Gallardo, L. A. and Meju, M. A.: Characterization of heterogeneous near-surface materials by joint 2D inversion of dc resistivity and seismic data, *Geophysical Research Letters*, 30, doi:10.1029/2003GL017370, <http://dx.doi.org/10.1029/2003GL017370>, 1658, 2003.
- Gamble, T. D.: Magnetotellurics with a remote magnetic reference, *Geophysics*, 44, doi:10.1190/1.1440923, <http://dx.doi.org/10.1190/1.1440923>, 1979.
- Gamble, T. D., Goubau, W. M., and Clarke, J.: Error analysis for remote reference magnetotellurics, *Geophysics*, 44, 959–968, doi:10.1190/1.1440988, <http://dx.doi.org/10.1190/1.1440988>, 1979.
- Gibson, P. J.: Geophysical Characteristics of the Tow Valley Fault Zone in North-East Ireland, *Irish Journal of Earth Sciences*, 22, 1–13, 2004.
- Glover, P. W. J.: A generalized Archie's law for n phases, *Geophysics*, 75, E247–E265, doi:10.1190/1.3509781, <http://dx.doi.org/10.1190/1.3509781>, 2010.
- Goodman, R., Jones, G. L. I., Kelly, J., Slower, E., and O'Neill, N.: Geothermal Energy Resource Map of Ireland, Final Report, Tech. rep., Sustainable Energy Authority of Ireland, Dublin, Ireland, 2004.
- Guéguen, Y. and Palciauskas, V.: Introduction to the physics of rocks, Princeton University Press, New Jersey, 1994.
- Hautot, S., Single, R. T., Watson, J., Harrop, N., Jerram, D. A., Tarits, P., Whaler, K., and Dawes, G.: 3-D magnetotelluric inversion and model validation with gravity data for the investigation of flood basalts and associated volcanic rifted margins, *Geophysical J. International*, 170, 1418–1430, doi:10.1111/j.1365-246X.2007.03453.x, <http://dx.doi.org/10.1111/j.1365-246X.2007.03453.x>, 2007.
- Heincke, B., Jegen, M., Moorkamp, M., and Hobbs, R. W.: Joint-inversion of magnetotelluric, gravity and seismic data to image sub-basalt sediments offshore the Faroe-Islands, *SEG Technical Program Expanded Abstracts*, 2014, 770–775, <http://oceanrep.geomar.de/26727/>, 2014.
- Hepworth, C. and Sanders, I. S., eds.: The Geology of Ireland: Second Edition, Dunedin Academic Press Ltd., 2 edn., <http://www.worldcat.org/isbn/1903765722>, 2009.
- Jegen, M. D., Hobbs, R. W., Tarits, P., and Chave, A.: Joint inversion of marine magnetotelluric and gravity data incorporating seismic constraints. Preliminary results of sub-basalt imaging off the Faroe Shelf, *Earth and Planetary Science Letters*, 282, 47–55, 2009.
- Jones, A. and Jödicke, H.: Magnetotelluric transfer function estimation improvement by a coherence-based rejection technique, in: *SEG Technical Program Expanded Abstracts 1984*, *SEG Technical Program Expanded Abstracts*, pp. 51–55, Society of Exploration Geophysicists, doi:10.1190/1.1894081, <http://dx.doi.org/10.1190/1.1894081>, 1984.
- Jones, A. G.: Static shift of magnetotelluric data and its removal in a sedimentary basin environment, *Geophysics*, 53, 967–978, doi:10.1190/1.1442533, <http://dx.doi.org/10.1190/1.1442533>, 1988.
- Jones, A. G.: Electrical properties of the lower continental crust, in: *Continental Lower Crust*, vol. 23, pp. 81–143, Elsevier Amsterdam, 1992.
- Jones, A. G.: Electromagnetic interrogation of the anisotropic Earth: Looking into the Earth with polarized spectacles, *Physics of the Earth and Planetary Interiors*, 158, 281–291, doi:10.1016/j.pepi.2006.03.026, <http://dx.doi.org/10.1016/j.pepi.2006.03.026>, 2006.

- 710 Jones, A. G.: Three-dimensional galvanic distortion of three-dimensional regional conductivity structures: Comment on "Three-dimensional joint inversion for magnetotelluric resistivity and static shift distributions in complex media" by Yutaka Sasaki and Max A. Meju, *J. Geophys. Res.*, 116, B12 104+, doi:10.1029/2011jb008665, <http://dx.doi.org/10.1029/2011jb008665>, 2011.
- Jones, A. G.: *Distortion of magnetotelluric data: its identification and removal*, Cambridge University Press, 2012.
- Jones, A. G., Chave, A. D., Egbert, G., Auld, D., and Bahr, K.: A Comparison of Techniques for Magnetotelluric Response Function Estimation, *Journal of Geophysical Research*, 94, 14 201–14 213, doi:10.1029/jb094ib10p14201, <http://dx.doi.org/10.1029/jb094ib10p14201>, 1989.
- Jupp, D. L. B. and Vozoff, K.: Stable Iterative Methods for the Inversion of Geophysical Data, *Geoph. J. Roy. Astr. Soc.*, 42, 957–976, 1975.
- Kaufman, Alekseev, D., and Oristaglio, M.: *Principles of Electromagnetic Methods in Surface Geophysics*, Elsevier, Amsterdam, NL, 2014.
- Kelbert, A., Meqbel, N., Egbert, G. D., and Tandon, K.: ModEM: A modular system for inversion of electromagnetic geophysical data, *Computers & Geosciences*, 66, 40–53, doi:10.1016/j.cageo.2014.01.010, <http://dx.doi.org/10.1016/j.cageo.2014.01.010>, 2014.
- 720 Keller, G. V. and Frischknecht, F. C.: *Electrical methods in geophysical prospecting*, Pergamon Press, Oxford, UK, 1966.
- Leväniemi, H., Beamish, D., Hautaniemi, H., Kurimo, M., Suppala, I., Vironmäki, J., Cuss, R. J., Lahti, M., and Tartaras, E.: The JAC airborne EM system: AEM-05, *Journal of Applied Geophysics*, 67, 219–233, doi:10.1016/j.jappgeo.2007.10.001, <http://dx.doi.org/10.1016/j.jappgeo.2007.10.001>, 2009.
- 725 Luijendijk, E. and Gleeson, T.: How well can we predict permeability in sedimentary basins? Deriving and evaluating porosity-permeability equations for noncemented sand and clay mixtures, *Geofluids*, 15, 67–83, doi:10.1111/gfl.12115, <http://dx.doi.org/10.1111/gfl.12115>, 2015.
- Martini, F., Hobbs, W. W., Bean, C. J., and Single, R.: A complex 3D volume for sub-basalt imaging, *First Break*, 23, 41–51, 2005.
- Mavko, G., Mukerji, T., and Dvorkin, J.: *The Rock Physics Handbook. Tools for Seismic Modelling of Porous Media*, Cambridge University Press, Cambridge, UK, 2009.
- 730 McNeice, G. W. and Jones, A. G.: Multisite, multifrequency tensor decomposition of magnetotelluric data, *Geophysics*, 66, 158–173, doi:10.1190/1.1444891, <http://dx.doi.org/10.1190/1.1444891>, 2001.
- Miensopust, M. P.: *Multidimensional Magnetotellurics. A 2D case study and a 3D approach to simultaneously invert for resistivity structure and distortion parameters*, Ph.D. thesis, Faculty of Science, National University of Ireland, Galway, 2010.
- 735 Miensopust, M. P., Jones, A. G., Hersir, G. P., and Vilhjálmsson, A. M.: The Eyjafjallajökull volcanic system, Iceland: insights from electromagnetic measurements, *Geophysical Journal International*, 199, 1187–1204, doi:10.1093/gji/ggu322, <http://dx.doi.org/10.1093/gji/ggu322>, 2014.
- Minsley, B. J.: A trans-dimensional Bayesian Markov chain Monte Carlo algorithm for model assessment using frequency-domain electromagnetic data, *Geophysical Journal International*, 187, 252–272, doi:10.1111/j.1365-246x.2011.05165.x, <http://dx.doi.org/10.1111/j.1365-246x.2011.05165.x>, 2011.
- 740 Mitchell, W. I.: *The Geology of Northern Ireland : Our Natural Foundation*, Geological Survey of Northern Ireland, Belfast, UK, <http://www.worldcat.org/isbn/0852724543>, 2004.
- Muñoz, G.: Exploring for Geothermal Resources with Electromagnetic Methods, *Surv. Geophys.*, 35, 101–122, doi:10.1007/s10712-013-9236-0, <http://dx.doi.org/10.1007/s10712-013-9236-0>, 2014.
- 745 Naylor, D. and Shannon, P.: *Petroleum geology of Ireland*, Dunedin Academic Press Ltd, Edinburgh, UK, <http://www.worldcat.org/isbn/9781906716134>, 2011.

- Nover, G.: Electrical Properties of Crustal and Mantle Rocks - A Review of Laboratory Measurements and their Explanation, *Surveys in Geophysics*, 26, 593–651, doi:10.1007/s10712-005-1759-6, <http://dx.doi.org/10.1007/s10712-005-1759-6>, 2005.
- Pape, H., Clauser, C., and Iffland, J.: Permeability prediction based on fractal pore-space geometry, *Geophysics*, 64, 1447–1460, 1999.
- 750 Pape, H., Clauser, C., and Iffland, J.: Variation of Permeability with Porosity in Sandstone Diagenesis Interpreted with a Fractal Pore space Model, *Pure Applied Geophysics*, 157, 603–619, 2000.
- Pasquali, R., O'Neill, N., Reay, D., and Waugh, T.: The geothermal potential of Northern Ireland, in: *Proceedings World Geothermal Congress*, 2010.
- Pellerin, L. D. and Hohmann, G. W.: Transient electromagnetic inversion; a remedy for magnetotelluric static shifts, *Geophysics*, 55, 1242–  
755 1250, doi:10.1190/1.1442940, <http://dx.doi.org/10.1190/1.1442940>, 1990.
- Poll, H. E., Weaver, J. T., and Jones, A. G.: Calculations of voltages for magnetotelluric modeling of a region with near-surface inhomogeneities, *Phys. Earth Planet. Inter.*, 53, 287–297, 1989.
- Raffensperger, J. P.: Numerical simulation of basin-scale hydrochemical processes, in: *Advances in Porous Media*, edited by Corapcioglu, M. Y., vol. 3, pp. 185–305, Elsevier, 1996.
- 760 Raiche, A.: A flow-through Hankel transform technique for rapid, accurate Green's function computation, *Radio Sci.*, 34, 549–555, doi:10.1029/1998rs900037, <http://dx.doi.org/10.1029/1998rs900037>, 1999.
- Reay, D. and Kelly, J.: Deep Geothermal Energy Resource Potential in Northern Ireland, *European Geologist*, 29, 14–18, 2010.
- Rosenkjaer, G. K., Gasperikova, E., Newman, G. A., Arnason, K., and Lindsey, N. J.: Comparison of 3D MT inversions for geothermal exploration: Case studies for Krafla and Hengill geothermal systems in Iceland, *Geothermics*, 57, 258–274, 2015.
- 765 Rousseeuw, P. J.: Least Median of Squares Regression, *Journal of the American Statistical Association*, 79, 871–880, doi:10.1080/01621459.1984.10477105, <http://dx.doi.org/10.1080/01621459.1984.10477105>, 1984.
- Rousseeuw, P. J. and Leroy, A. M.: *Robust Regression and Outlier Detection*, Wiley-Interscience, 1 edn., <http://www.worldcat.org/isbn/0471488550>, 2003.
- Sasaki, Y. and Meju, M. A.: Three-dimensional joint inversion for magnetotelluric resistivity and static shift distributions in complex media,  
770 *J. Geophys. Res.*, 111,, doi:10.1029/2005JB004009, <http://dx.doi.org/10.1029/2005JB004009>, 2006.
- Schnaidt, S. and Heinson, G.: Bootstrap resampling as a tool for uncertainty analysis in 2-D magnetotelluric inversion modelling, *Geophysical Journal International*, 203, 92–106, 2015.
- Simpson, F. and Bahr, K.: *Practical Magnetotellurics*, Cambridge University Press, Cambridge, UK, <http://www.worldcat.org/isbn/9780521817271>, 2005.
- 775 Sternberg, B. K., Washburne, J. C., and Pellerin, L.: Correction for the static shift in magnetotellurics using transient electromagnetic soundings, *Geophysics*, 53, 1459–1468, doi:10.1190/1.1442426, <http://dx.doi.org/10.1190/1.1442426>, 1988.
- Torres-Verdin, C. and Bostick, F. X.: Principles of spatial surface electric field filtering in magnetotellurics; electromagnetic array profiling (EMAP), *Geophysics*, 57, 603–622, doi:10.1190/1.1443273, <http://dx.doi.org/10.1190/1.1443273>, 1992.
- Ward, S. H. and Hohmann, G. W.: *Electromagnetic Methods in Applied Geophysics*, vol. 1, Theory, pp. 131–312, 1988.
- 780 Wight, D. and Bostick, F. X.: Cascade decimation—A technique for real time estimation of power spectra, in: *Acoustics, Speech, and Signal Processing*, IEEE International Conference on ICASSP &#039;80., vol. 5, pp. 626–629, IEEE, doi:10.1109/icassp.1980.1170868, <http://dx.doi.org/10.1109/icassp.1980.1170868>, 1980.
- Wilson, H. E. and Manning, P. I.: *Geology of the Causeway Coast*, British Geological Survey, Nottingham, UK, <http://www.worldcat.org/isbn/0337060940>, 1978.



785 Zinszner, B. and Pellerin, F. M.: A Geoscientist's Guide to Petrophysics, Editions Technip, Paris, France, 2007.

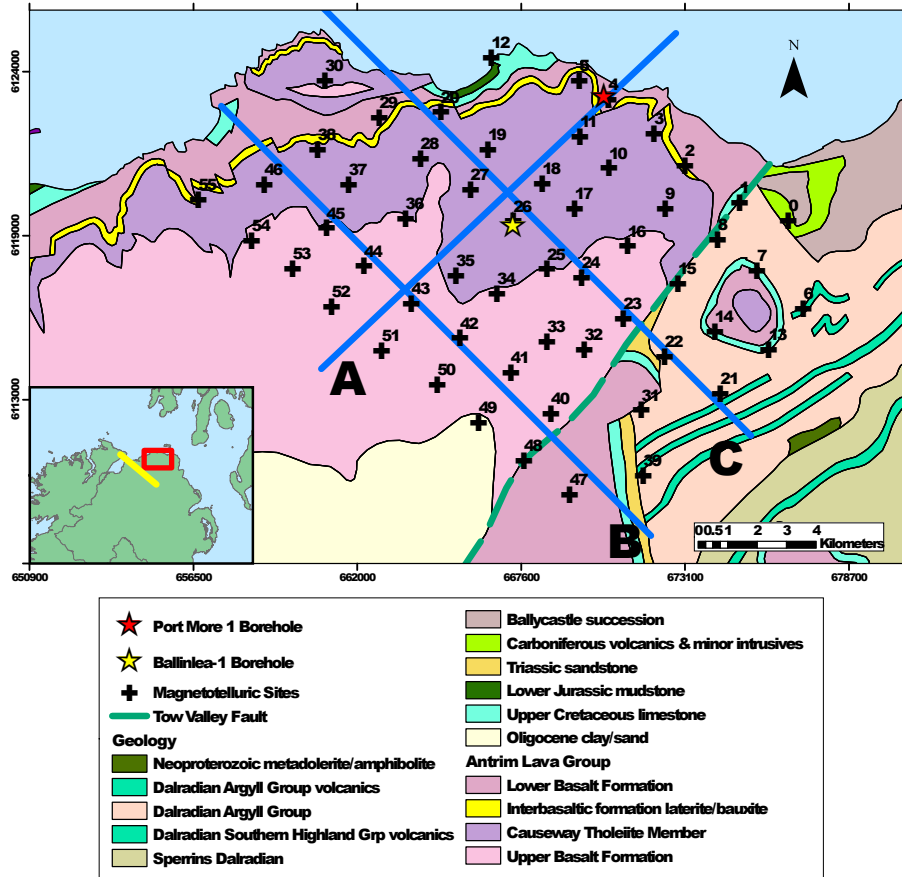

**Figure 1.** Geological map of Rathlin Basin area, overlain with magnetotelluric acquisition sites numbered and denoted by black crosses. Note the large areal extent of the Antrim Lava Group basalts, with minimal surface expression of the underlying sedimentary basin. Profiles A, B and C denote the locations corresponding to Figures 13 – 15. Inset map shows the northern half of Ireland, with the location of the magnetotelluric survey area shown by the red rectangle. The yellow line indicates the location of the density profile shown in Figure 3.

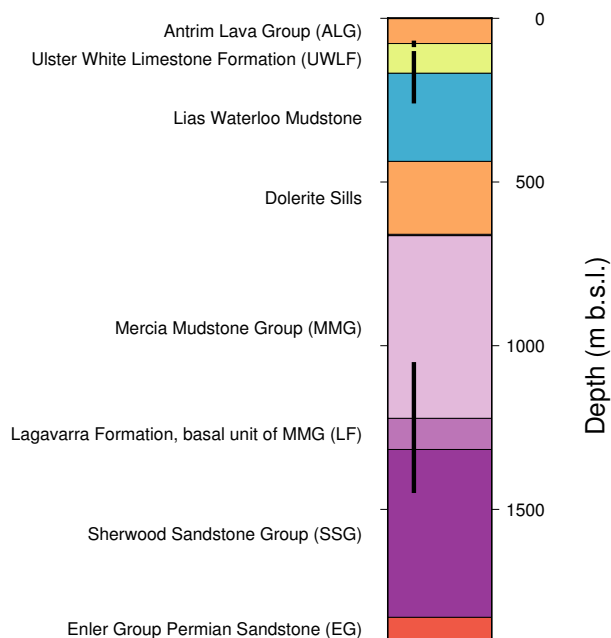

**Figure 2.** Stratigraphy encountered in the Port More 1 Borehole (left), and measured normal resistivity data (right). Stratigraphy encountered includes Paleogene Antrim Lava Group (ALG) of basalts and tuffs, Cretaceous Ulster White Limestone Formation (UWLF), Jurassic Lower Lias sandstones, late-to-mid-Triassic Mercia Mudstone Group (MMG), early-Triassic Sherwood Sandstone Group (SSG), and late-Permian Enler Group (EG) Sandstones. Due to technical difficulties the resistivity data were acquired in three sections.

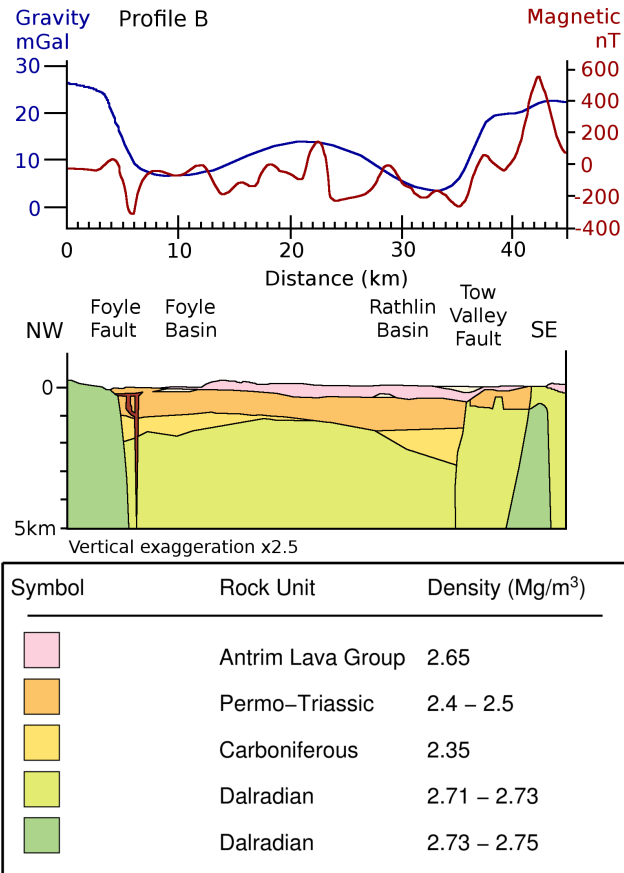

**Figure 3.** Density model from Mitchell (2004), showing the broad geological structure predicted prior to this study. Density profile locality is shown in Figure 1 (inset). Although the profile crosses the Rathlin Basin south-west of the MT survey area, a similar lithological sequence is expected elsewhere in the basin, including the survey area.

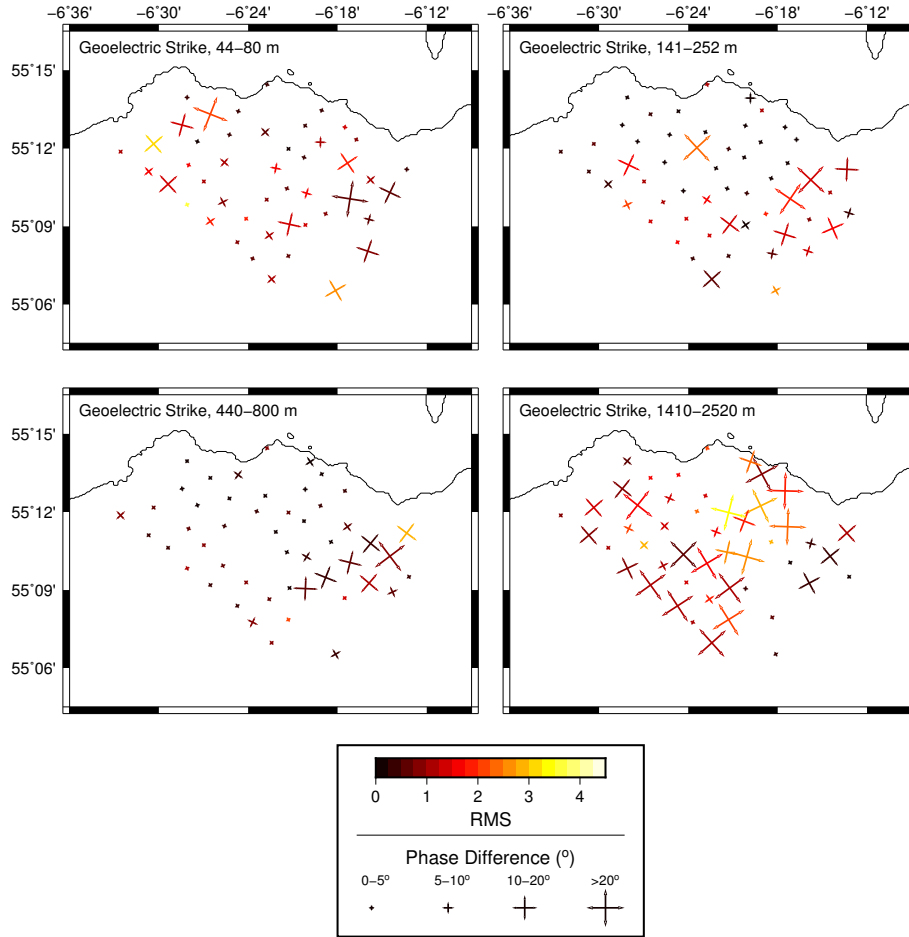

**Figure 4.** Visualisation of dimensionality of MT data, decomposed using the *strike* analysis program McNeice and Jones (2001) over a range of depth bands (in metres below sea level). The orthogonal vectors at each MT site location indicate the azimuth of best-fitting geoelectric strike direction, coloured by the RMS misfit between the observed MT response and the Groom-Bailey model response for the best-fit strike direction. The orthogonal pair of vectors is required as geoelectric strike estimates have a  $90^\circ$  ambiguity. The size of orthogonal vectors is classified by the phase difference, with larger vectors corresponding to larger phase differences. Small phase differences are associated with 1D resistivity structure, whereas larger phase differences occur with 2- and 3-D structure. Larger RMS misfits indicate that the decomposition to a 2-D structure is potentially invalid, and can be caused by either significant noise contamination and distortion of the data, or 3-D structure.

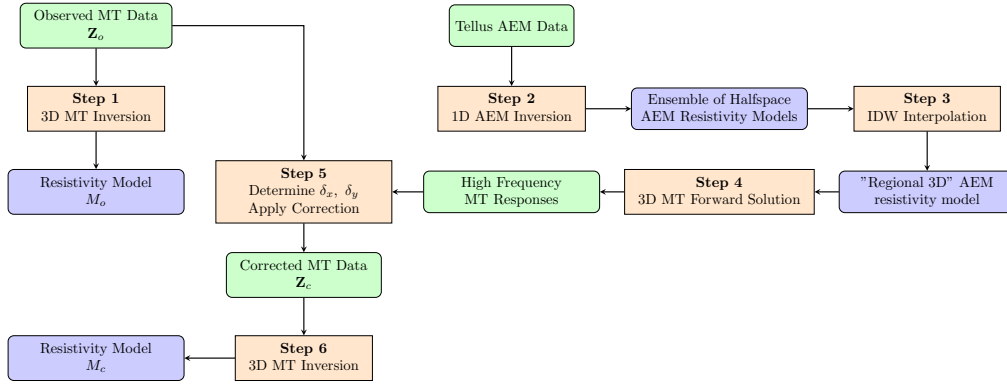

1

**Figure 5.** Flowchart illustrating the steps required to a) find an original, uncorrected resistivity model  $M_o$  from MT data (Step 1 only), and b) find an improved, static shift corrected resistivity model  $M_c$  from MT data, with coincident airborne FDEM data (data from the Tellus Project used for this study). For clarification, the MT data used in Step 5 are in their original co-ordinate system, whereas the MT data in Steps 1 and 6 are rotated to a bearing of  $315^\circ$  for inversion. IDW in Step 3 refers to inverse distance weighting.

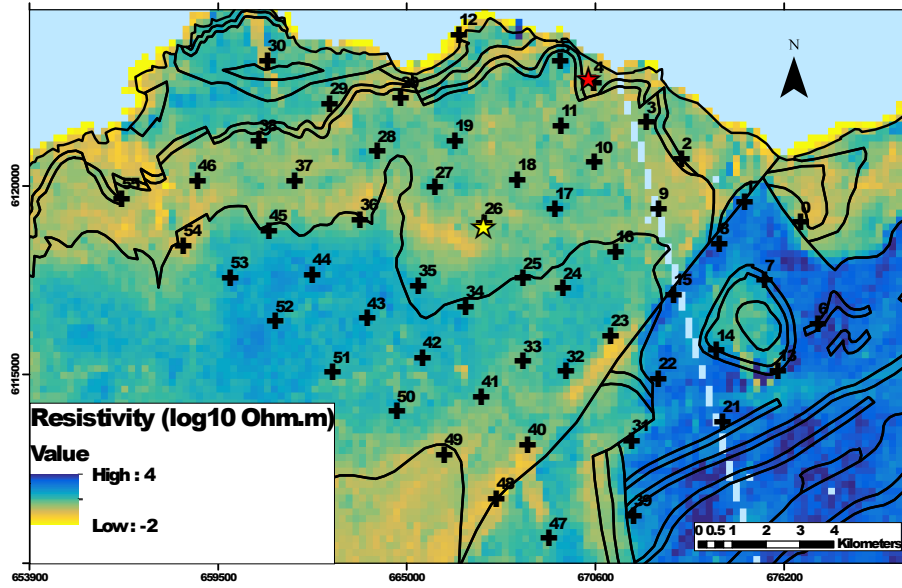

**Figure 6.** Map of airborne FDEM half-space resistivity models, overlain with geological boundaries (solid black lines, as in Figure 1) and MT site locations (black cross symbols). The model exhibits good correlation with the mapped boundaries, as well as variation within each geological unit. Note that data from one flight line are missing, resulting in a white line in the figure. These absences were interpolated across in the synthetic model.

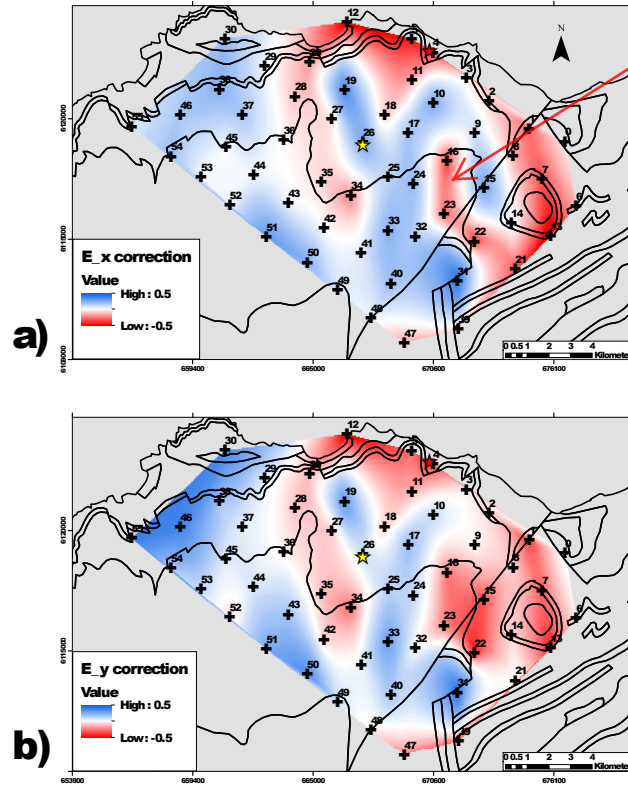

I have objections against the spatial interpolation technique resulting in a rather continuous smeared pattern which might give a very misleading impression: E.g. the arrow points at the center of sites 15,16,23,24 - interpolation between #15 and #24 is equally justified compared to the present interpolation and would show a blue connection leaving #16 isolated - this would result in a completely different picture!

**Figure 7.** Spatial distribution of static correction factors  $\delta_{Ex}$  (a) and  $\delta_{Ey}$  (b), in decades (i.e. as additive factors, where +0.5 corresponds to a multiplicative factor of  $10^{0.5}$ ). Blue shading indicates resistive corrections to the data whereas red indicates conductive corrections. Note that for the majority of sites,  $\delta_{Ex}$  and  $\delta_{Ey}$  are similar in magnitude and polarity. The magnitudes of static corrections are generally less than 0.5 decades in size, corresponding to apparent resistivity estimates being shifted by factors of less than three.



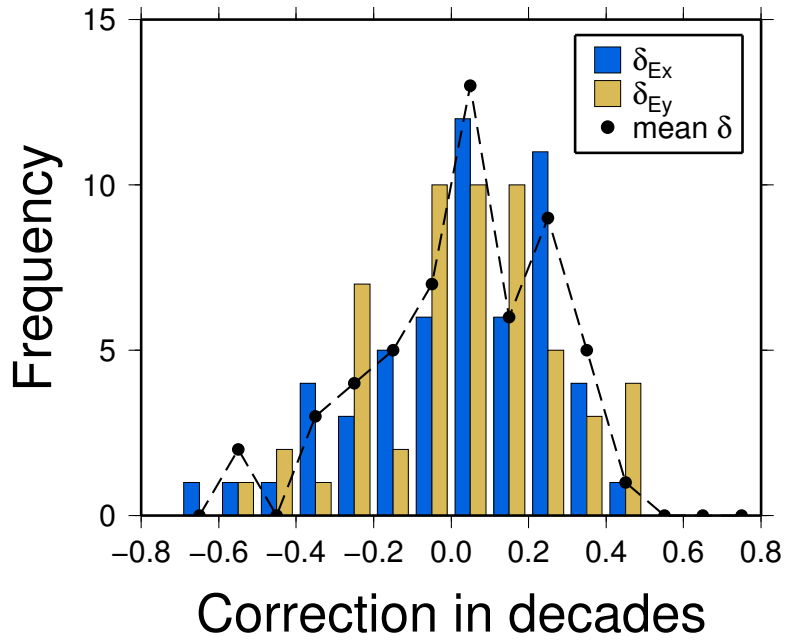

**Figure 8.** Distribution of calculated static correction factors  $\delta_{Ex}$  (blue) and  $\delta_{Ey}$  (yellow), in decades (i.e. as additive factors, where +0.5 corresponds to a multiplicative factor of  $10^{0.5}$ ). Statistical quantities related to these distributions are tabulated in Table 1.

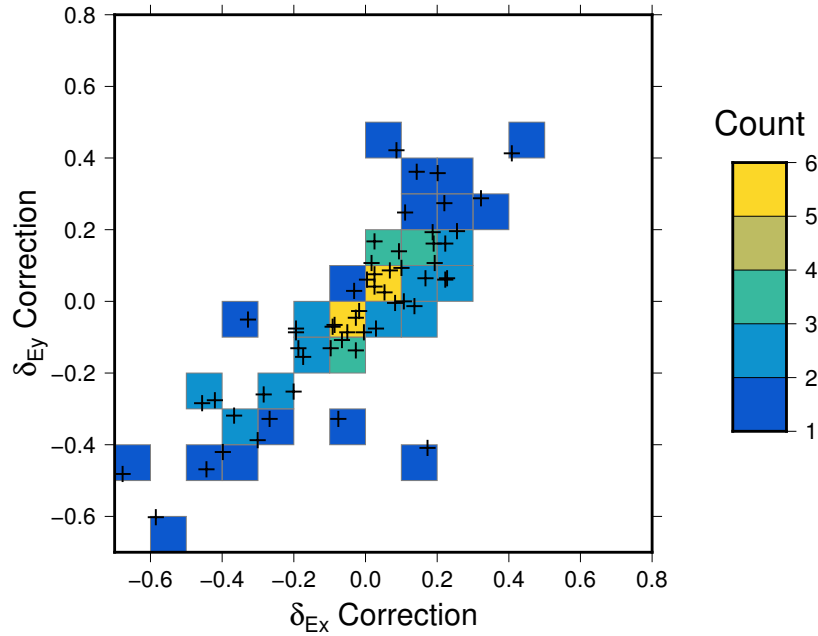

**Figure 9.** Bivariate distribution of calculated static shift corrections  $\delta_{Ex}$  and  $\delta_{Ey}$  in decades (i.e. as additive factors, where +0.5 corresponds to a multiplicative factor of  $10^{0.5}$ ), paired by site. The strong clustering and  $45^\circ$  trend (i.e.,  $\delta_{Ex} \approx \delta_{Ey}$ ) indicate that the orthogonal static shifts are generally similar sized across the survey area, with no observable regional trend of greater static shift of one polarisation.

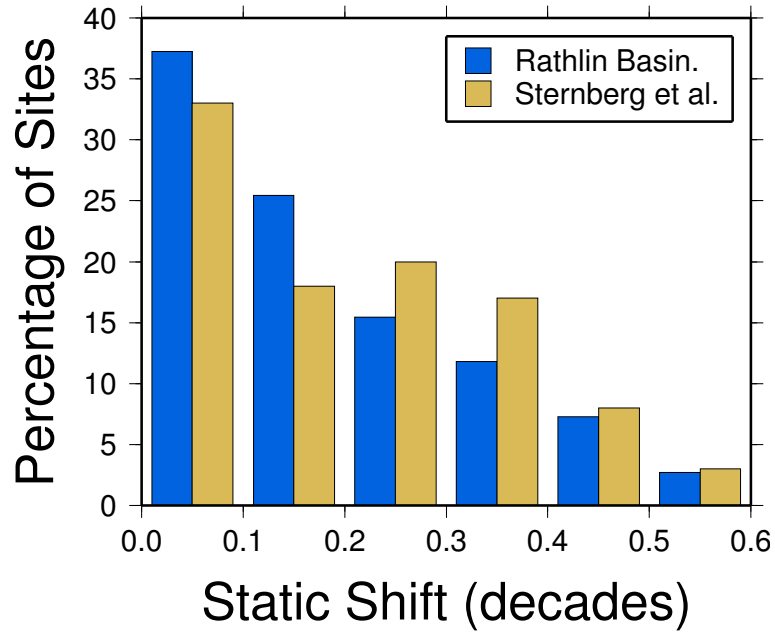

**Figure 10.** Comparison of distributions of static shift magnitudes (in decades, i.e., logarithmic transforms of static shifts of both modes) determined for this study (blue) and that of Sternberg et al. (1988) (yellow) for the trans-Cascades, USA. Note that the magnitude of the determined static corrections in decades is assumed equivalent to the static shift present. The two distributions show a similar relationship between magnitude and frequency of occurrence, with an increased occurrence of shifts in the 0.3 to 0.4 range in the trans-Cascade distribution attributed by Sternberg et al. to regionally more complicated geology.

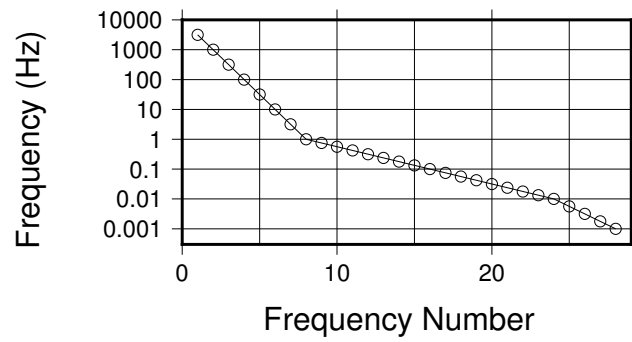

**Figure 11.** Chart of frequency indices and values used in 3-D inversion process. Frequency spacings per decade were 2 (for 3000 – 1 Hz), 8 (for 1 – 0.01 Hz), and 4 (for 0.01 – 0.001 Hz).

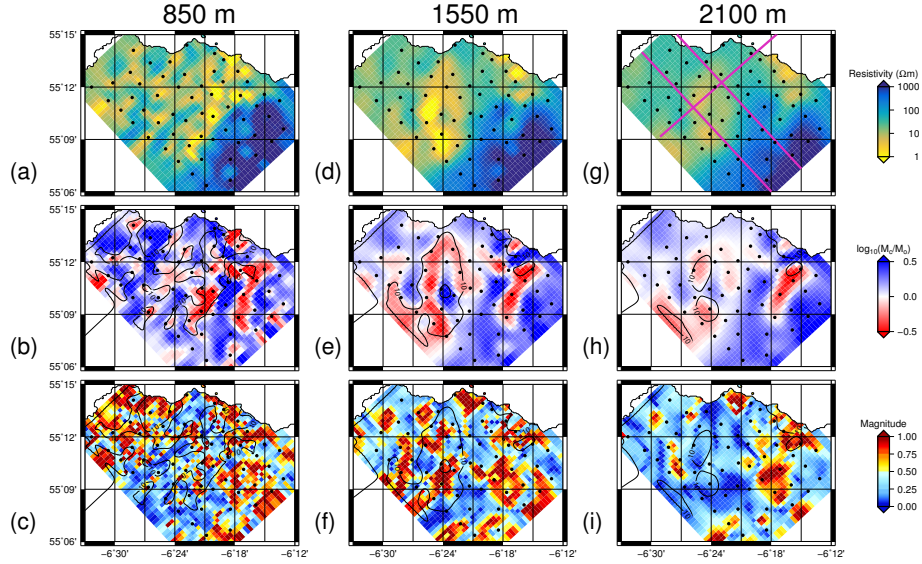

**Figure 12.** Top row shows resistivity slices through the static shift corrected model  $M_c$  taken at 900 (a), 1600 (d) and 2100 (g) metres below sea level. Middle row shows the resistivity difference  $\Delta$  between the models in decades ( $\Delta(M_c, M_o) = \log_{10}(M_c/M_o)$ ) for the same depths, where red shows  $M_c$  more conductive than  $M_o$ , and blue more resistive. Bottom row shows the magnitude of the normalised cross-gradient (the cross product of the gradient vectors of each model  $\nabla M$ , as defined in Equation 7) as a diagnostic of structural similarity between the models, with 0 (blue) showing parallel gradient vectors (i.e., very similar structure), and 1 (red) showing orthogonal gradient vectors and structural disagreement. Note that the difference and cross-gradient plots are overlain by the 10  $\Omega\text{m}$  contour from the corresponding resistivity slice. Magenta lines on subplot (g) indicate the location of Profiles A, B and C.

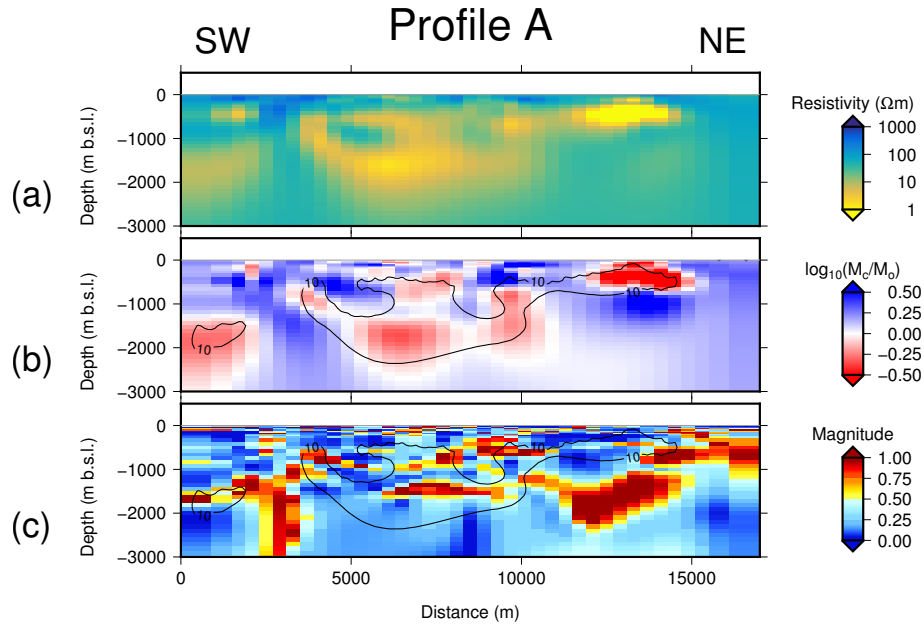

**Figure 13.** Profile A taken along the axis of the concealed basin through the static shift corrected resistivity model  $M_c$  (location shown on Figures 1 and 12g). The resistivity is shown in (a), the resistivity difference  $\Delta(M_c, M_o)$  is shown in (b), and the cross-gradient of  $M_c$  and  $M_o$  is shown in (c). Contours on the difference and cross-gradient plots show the 10  $\Omega\text{m}$  contour. For presentation a vertical of exaggeration of 1.5 is used.

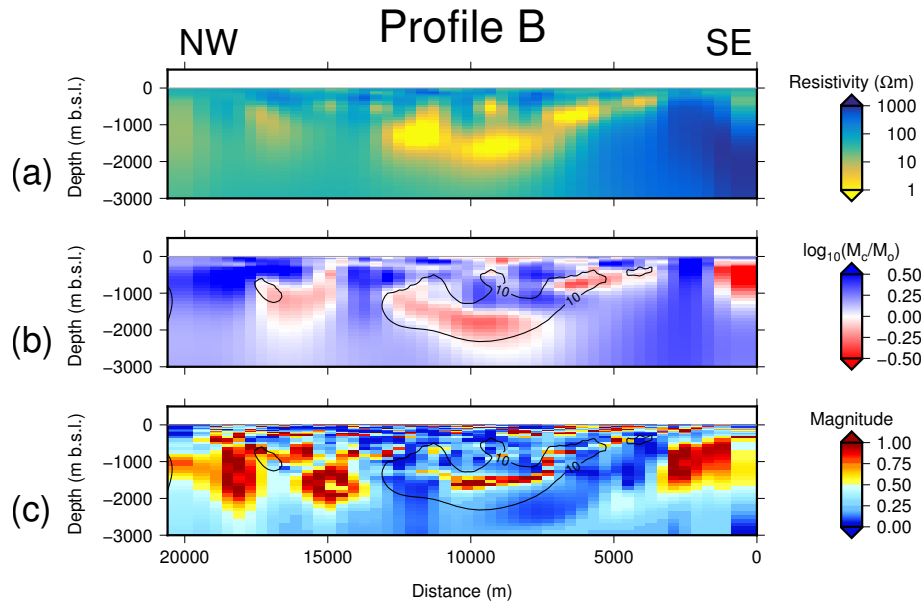

**Figure 14.** Profile B taken across the static shift corrected resistivity model  $M_c$  (location shown on Figures 1 and 12g). The resistivity is shown in (a), the resistivity difference  $\Delta(M_c, M_o)$  is shown in (b), and the cross-gradient of  $M_c$  and  $M_o$  is shown in (c). Contours on the difference and cross-gradient plots show the 10  $\Omega\text{m}$  contour. For presentation a vertical of exaggeration of 1.5 is used.

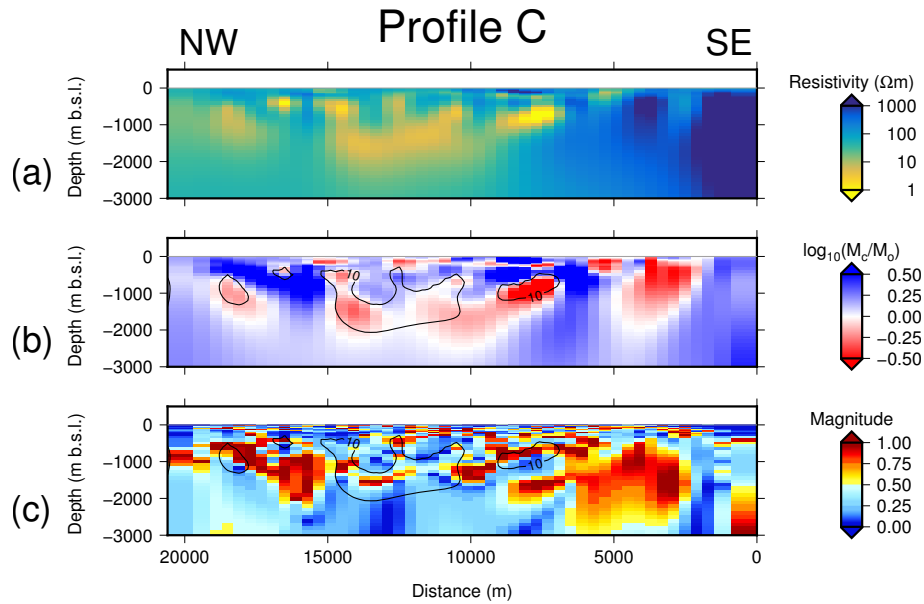

**Figure 15.** Profile C taken across the static shift corrected resistivity model  $M_c$  (location shown on Figures 1 and 12g). The resistivity is shown in (a), the resistivity difference  $\Delta(M_c, M_o)$  is shown in (b), and the cross-gradient of  $M_c$  and  $M_o$  is shown in (c). Contours on the difference and cross-gradient plots show the 10  $\Omega\text{m}$  contour. For presentation a vertical of exaggeration of 1.5 is used.



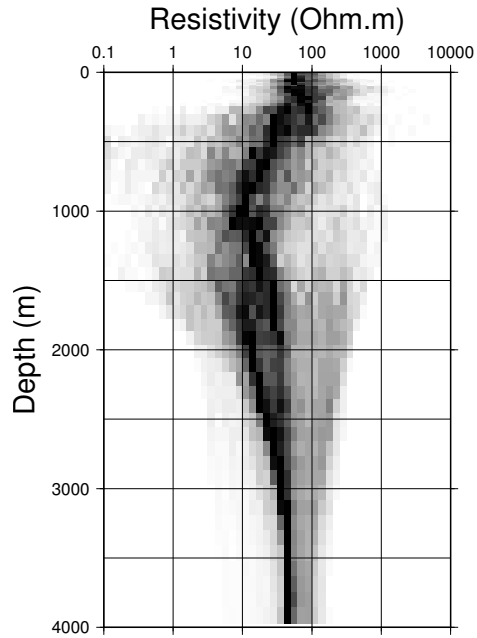

**Figure 16.** Representative histogram model of the portion of the static shift corrected model  $M_c$  covering the Rathlin basin only. Each layer represents the distribution of resistivities present in that layer of the model, normalised by the number of counts for the mode of that layer (black). Whereas a wide spread of resistivities is present from 300 m to 2500 m depth, the column of modal resistivities can be viewed as a "typical" 1D structure of the basin, with a distinct minimum of  $\approx 10 \Omega\text{m}$  evident at 1100 m depth, the depth interval of the MMG observed in the Port More 1 Borehole.

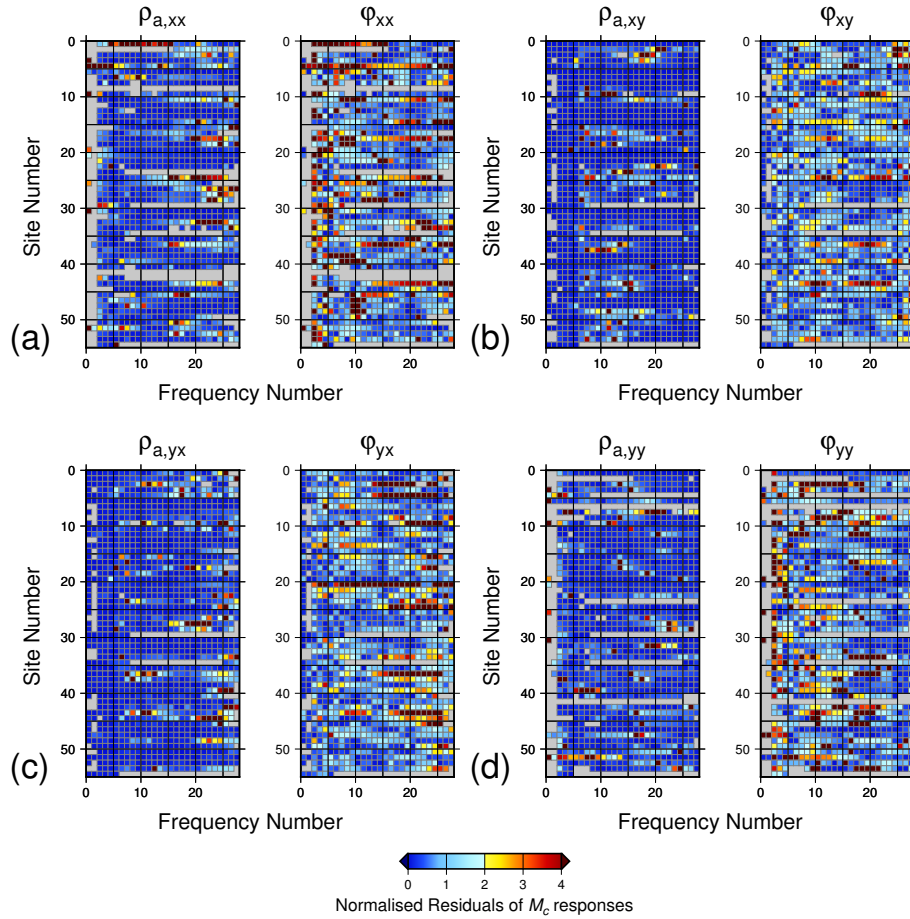

**Figure 17.** Visualisation of the normalised residuals of the magnetotelluric responses of  $M_c$  compared to observed data at each site (numbered as per Figure 1) and inversion frequency number (as shown in Figure 11), for each element of the impedance tensor (a-d). The normalised residual is determined by taking the absolute value of the difference between model response and datum, and normalised by the error used in inversion (i.e., the greater of the observed error or the applied error floor). Normalised residuals of less than one indicating a residual smaller than the error. Note that misfits of apparent resistivity use the logarithmic difference to determine the residual. Values in grey representing the lower quality data that were masked and not included in the inversion.

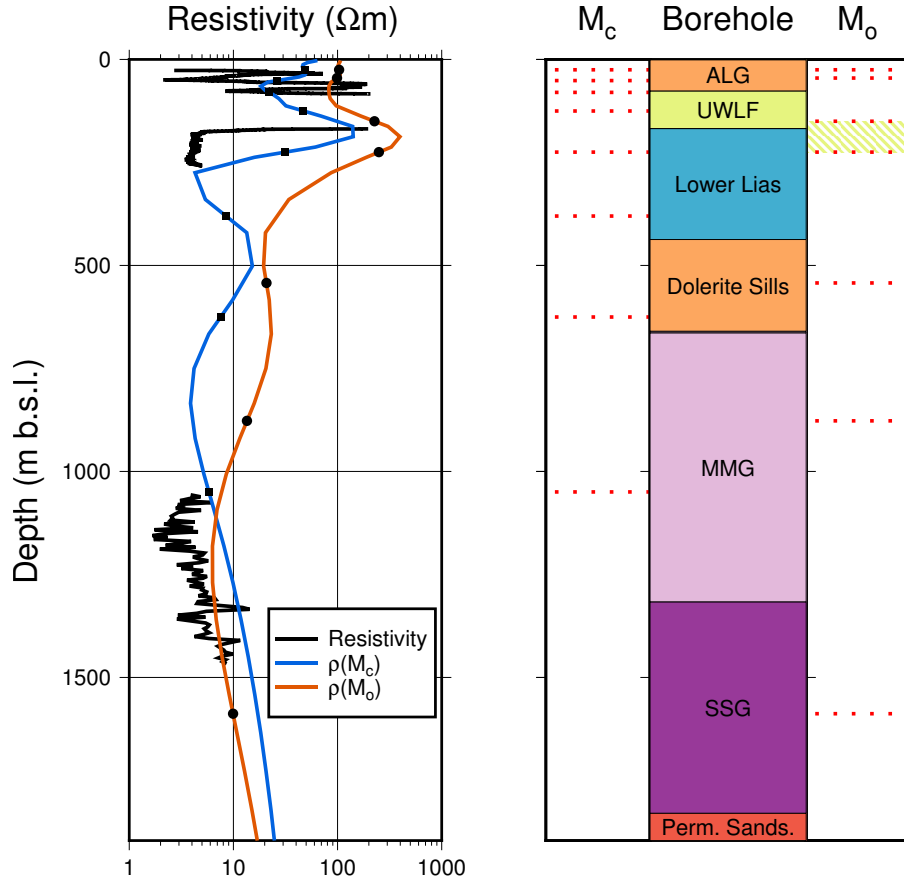

**Figure 18.** Left-hand panel shows the resistivity columns from both  $M_c$  (blue) and  $M_o$  (orange) adjacent to the Port More 1 Borehole, plotted with the observed normal resistivity data. Due to the regularisation in the inversion process, neither model can reproduce the high variability of resistivities within the ALG observed in the uppermost 100 m of normal resistivity data. Note the resistivity column of  $M_c$  approaches the observed low resistivities of the LLG, and reproduces the trend observed in the MMG and SSG resistivities, albeit with resistivities approximately half a decade greater. In contrast, the resistivity column of  $M_o$  correlates poorly with the observed normal resistivity data, with over-estimated resistivities and layer thicknesses. Right-hand panel shows interpreted structure of each resistivity column (patterned, on either side), with the observed borehole lithology in the centre column. The interpreted  $M_c$  structure shows significantly improved correlation with the observed lithology; in particular, the upper boundary of the MMG against the dolerite sills is recovered much closer to the true depth in  $M_c$  than in  $M_o$ . The static shift correction factors  $\delta_{Ex}$ ,  $\delta_{Ey}$  applied at this site were 0.40 and 0.38 (-0.40 and -0.42 in decades) respectively.

**Table 1.** Statistical measures of the  $\log_{10}$  of the corrective factors  $\delta_{Ex}$  and  $\delta_{Ey}$  (i.e., additive in logarithmic domain), as displayed in Figure 8. In addition to the means, medians and standard deviations of  $\log_{10} \delta_E$ , the means and medians of  $\delta_E$  (i.e., multiplicative) are also shown. Note that  $\delta_{\bar{E}}$  is the site-wise mean static shift - i.e., the mean of  $\delta_{Ex}$  and  $\delta_{Ey}$ , on a site-by-site basis.

|                                                          | Mean<br>( $\log_{10}$ ) | Median<br>( $\log_{10}$ ) | $\sigma$<br>( $\log_{10}$ ) | Mean  | Median |
|----------------------------------------------------------|-------------------------|---------------------------|-----------------------------|-------|--------|
| $\delta_{Ex}$                                            | -0.035                  | 0.011                     | 0.235                       | 0.923 | 1.03   |
| $\delta_{Ey}$                                            | -0.035                  | -0.020                    | 0.236                       | 0.923 | 0.955  |
| $\delta_{\bar{E}} = \frac{\delta_{Ex} + \delta_{Ey}}{2}$ | -0.035                  | -0.012                    | 0.225                       | 0.923 | 0.974  |
